# Supplementary material for: Genomic and Proteolytic Profiling of Lacticaseibacillus sp. PRA205: Insights into PepX- Mediated Bioactive Peptide Metabolism
Source: Research Square preprint supplement (doi:10.21203/rs.3.rs-7544664/v1), 2025-10-01

**Genomic and Proteolytic Profiling of *Lacticaseibacillus* sp. PRA205: Insights into PepX-Mediated Bioactive Peptide Metabolism**

Marianna Cristofolini1, Alice Cattivelli2, Alessandra Barbieri1, Giulia Zaccarini1, Loris Bertoldi3, Lisa Solieri1*, Davide Tagliazucchi2

1 Lactic acid bacteria and Yeast Biotechnology Lab (LYB), Department of Life Science, University of Modena and Reggio Emilia, 42122 Reggio Emilia, Italy

2 Nutritional Biochemistry Lab, Department of Life Science, University of Modena and Reggio Emilia, 42122 Reggio Emilia, Italy

3 BMR Genomics Srl, 35131, Padua, Italy

***Corresponding author:** Lisa Solieri,Department of Life Science, University of Modena and Reggio Emilia, Via Amendola 2, Besta Building, 42122 Reggio Emilia, Italy. Email: [lisa.solieri@unimore.it](mailto:lisa.solieri@unimore.it); Phone: +39 0522 522026.

**Supplementary Figures**

**Supplementary Fig. S1**. Functional distribution of core, dispensable, and singleton genes in COG categories. The dataset included *Lacticaseibacillus* sp. strain PRA205, *L. zeae* subsp. *zeae* DSM 20178T, *L. zeae* subp. *silagei* DSM 116376T, *L. parahuelsenbergensis* DSM 116105T, *L. huelsenbergensis* DSM 115425T, and *L. styriensis* DSM 116297T.


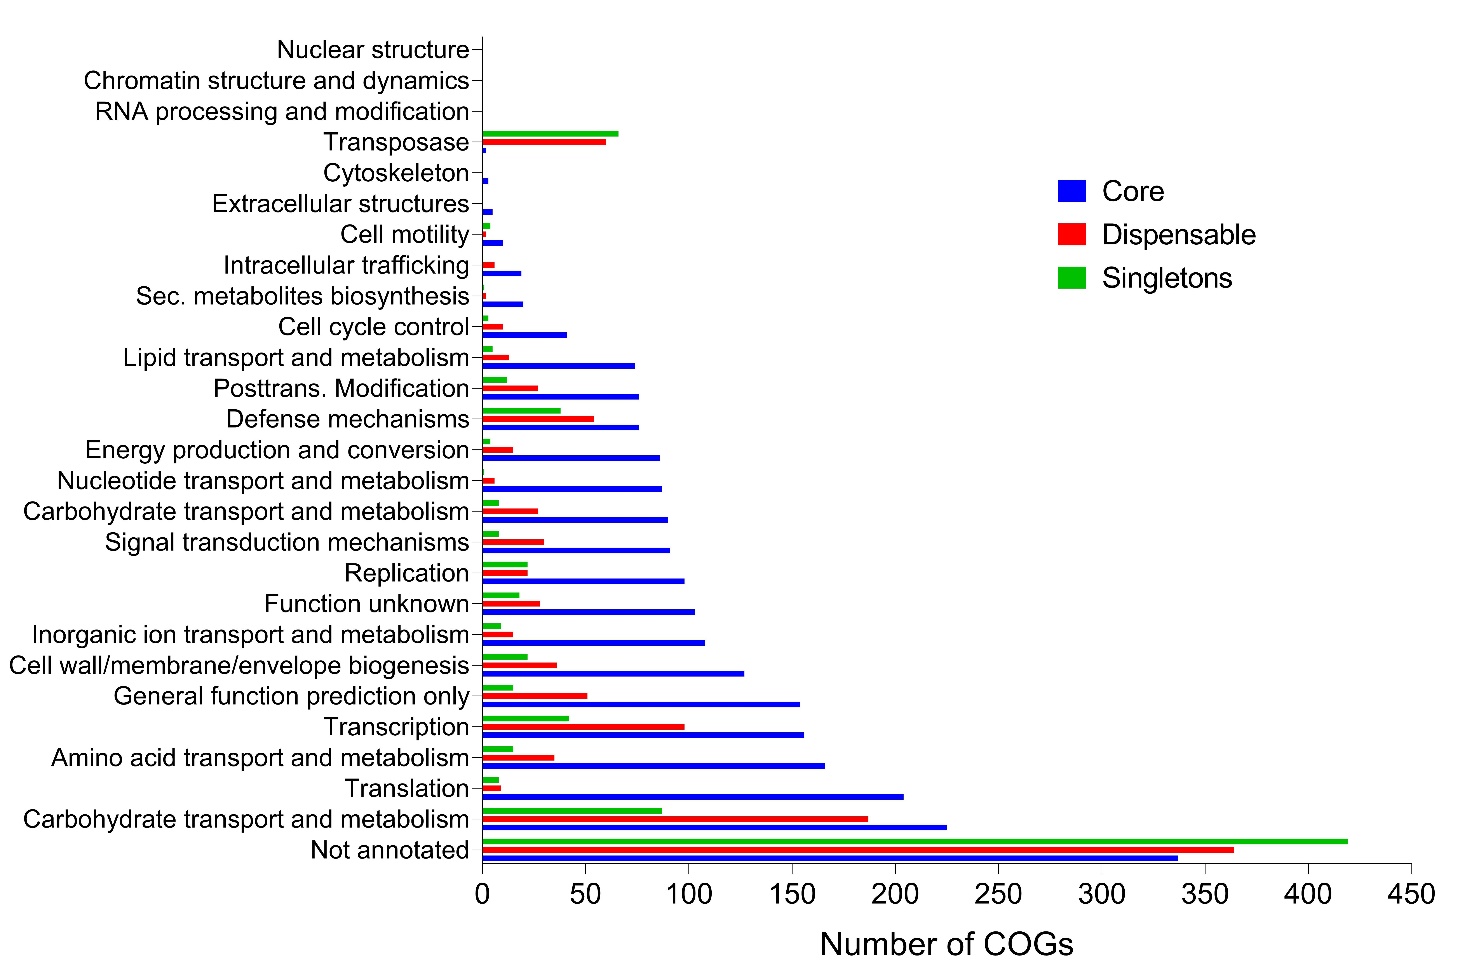


**Supplementary Fig. S2**. Partial purification of PepX from the cytoplasmic extract of PRA205 by size-exclusion chromatography (Sephadex G-100). Protein content was monitored by determining the absorbance values at 280 nm, whereas PepX activity was calculated by using Gly-Pro-*p*NA as substrate and measuring the absorbance at 410 nm.


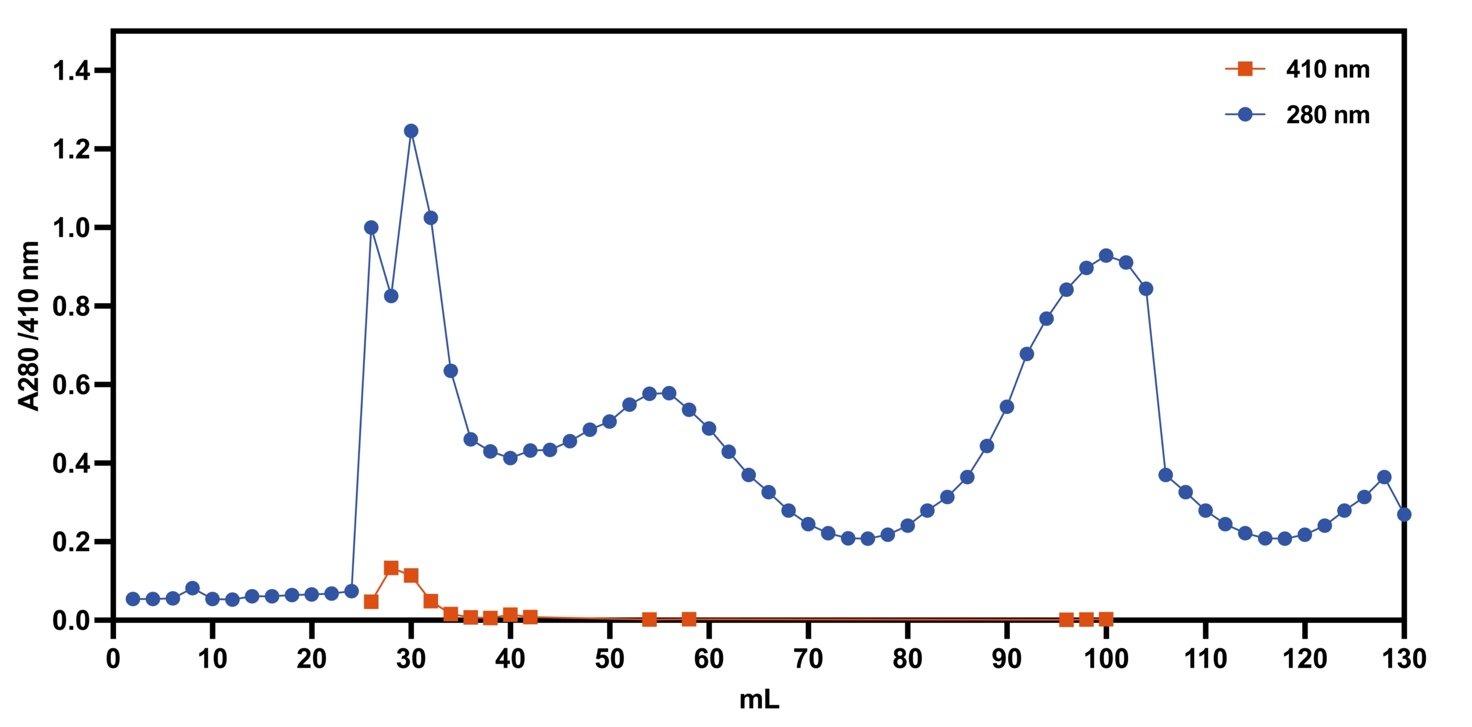

Supplement: Supplementary file 1 [file 3bb226a28ee259790c11018f.docx]
