# Supplementary material for: Genomic and Proteolytic Profiling of Lacticaseibacillus sp. PRA205: Insights into PepX- Mediated Bioactive Peptide Metabolism
Source: Research Square preprint supplement (doi:10.21203/rs.3.rs-7544664/v1), 2025-10-01
Supplement: Supplementary file 2 [file c64a5ec11e699909a005ce95.xlsx]

## Sheet: TableS1
Supplementary Table S1. Reference genomes used in this study.
Species	Strain name	Genome assembly	NCBI RefSeq assembly	NCBI Reference Sequence:	Genome Leght (Mb)	GC content (mol%)	Origin
GENOMIC SURVEY OF PROTEOLYTIC SYSTEM
Lacticaseibacillus casei	DSM 20011T = JCM 1134T = ATCC 393T	ASM82905v1	GCF_000829055.1	NZ_AP012544.1	2.92493	48	Cheese
Lacticaseibacillus paracasei	BL23	AASM2648v1	GCF_000026485.1	NC_010999.1	3.0792	46.5	Cheese
Lacticaseibacillus chiayiensis	FBL7	ASM1836307v1	GCF_018363075.1	NZ_CP074378.1	2.85541	47	Raw milk
Lacticaseibacillus rhamnosus	DSM 20021T = JCM 1136T = NBRC 3425T	ASM143540v1	GCF_001435405.1	na	2.9491	45.92	Unknow
Lacticaseibacillus rhamnosus	GG	ASM335345v1	GCF_003353455.1	NZ_CP031290.1	3.01012	46.5	Fecal samples from a healthy adult
Lacticaseibacillus zeae subsp. zeae	DSM 20178T = KCTC 3804T	ASM143374v1	GCF_001433745.1	na	3.12134	47.74	Macerated corn liqueur
Lacticaseibacillus zeae subsp.zeae	FBL8	ASM1836305v1	GCF_018363055.1	na	3.13252	47.8	Raw milk
Lactobacillus helveticus	DSM 20075T = CGMCC 1.1877T	ASM16085v1	GCF_000160855.1	na	2.02058		Cheese
Lactobacillus delbrueckii subsp. lactis	DSM 20072T	ASM227809v1	GCF_002278095.1	NZ_CP022988.1	2.16598	49	Cheese
Lacticaseibacillus huelsenbergensis	DSM 115425T = HO 1656T =NCIMB 15466T	ASM2972635v1	GCF_029726355.1	NZ_CP120687.1	3.09433	48	Croatian corn silage
Lacticaseibacillus parahuelsenbergensis	DSM 116105T = LD0937T = NCIMB 15471T	ASM3077026v1	GCF_030770265.1	NZ_CP132482.1	3.05587	48	Austrian grass silage
Lacticaseibacillus styriensis	DSM 116297T = SCR0063T = NCIMB 15473T	ASM3077029v1	GCF_030770295.1	NZ_CP132483.1	3.13405	48	Austrian corn silage
Lacticaseibacillus zeae subsp. silagei	DSM 116376T = EB0058T = NCIMB 15474T	ASM3077033v1	GCF_030770335.1	NZ_CP132484.1	3.04636	48	Austrian corn silage
ANIb, ANIm, GGDC, FastANI, AAI, POCP
Lacticaseibacillus casei	DSM 20011T = JCM 1134T = ATCC 393T	ASM82905v1	GCF_000829055.1	NZ_AP012544.1	2.92493	48	Cheese
Lacticaseibacillus chiayiensis	FBL7	ASM1836307v1	GCF_018363075.1	NZ_CP074378.1	2.85541	47	Raw milk
Lacticaseibacillus paracasei	BL23	AASM2648v1	GCF_000026485.1	NC_010999.1	3.0792	46.5	Cheese
Lacticaseibacillus rhamnosus	DSM 20021T = JCM 1136T = NBRC 3425T	ASM143540v1	GCF_001435405.1	na	2.9491	45.92	Unknow
Lacticaseibacillus rhamnosus	GG	ASM335345v1	GCF_003353455.1	NZ_CP031290.1	3.01012	46.5	Fecal samples from a healthy adult
Lacticaseibacillus huelsenbergensis	DSM 115425T = HO 1656T =NCIMB 15466T	ASM2972635v1	GCF_029726355.1	NZ_CP120687.1	3.09433	48	Croatian corn silage
Lacticaseibacillus parahuelsenbergensis	DSM 116105T = LD0937T = NCIMB 15471T	ASM3077026v1	GCF_030770265.1	NZ_CP132482.1	3.05587	48	Austrian grass silage
Lacticaseibacillus styriensis	DSM 116297T = SCR0063T = NCIMB 15473T	ASM3077029v1	GCF_030770295.1	NZ_CP132483.1	3.13405	48	Austrian corn silage
Lacticaseibacillus zeae subsp. silagei	DSM 116376T = EB0058T = NCIMB 15474T	ASM3077033v1	GCF_030770335.1	NZ_CP132484.1	3.04636	48	Austrian corn silage
Lacticaseibacillus zeae subsp. zeae	DSM 20178T = KCTC 3804T	ASM143374v1	GCF_001433745.1	na	3.12134	47.74	Macerated corn liqueur
Lacticaseibacillus zeae subsp.zeae	FBL8	ASM1836305v1	GCF_018363055.1	na	3.13252	47.8	Raw milk
CORE-BASED PHYLOGENOMICS (EDGAR3.0 pipeline)
Lacticaseibacillus zeae subsp. zeae	DSM 20178T = KCTC 3804T	ASM143374v1	GCF_001433745.1	na	3.12134	47.74	Macerated corn liqueur
Lacticaseibacillus zeae subsp.zeae	FBL8	ASM1836305v1	GCF_018363055.1	na	3.13252	47.8	Raw milk
Lacticaseibacillus huelsenbergensis	DSM 115425T = HO 1656T =NCIMB 15466T	ASM2972635v1	GCF_029726355.1	NZ_CP120687.1	3.09433	48	Croatian corn silage
Lacticaseibacillus parahuelsenbergensis	DSM 116105T = LD0937T = NCIMB 15471T	ASM3077026v1	GCF_030770265.1	NZ_CP132482.1	3.05587	48	Austrian grass silage
Lacticaseibacillus styriensis	DSM 116297T = SCR0063T = NCIMB 15473T	ASM3077029v1	GCF_030770295.1	NZ_CP132483.1	3.13405	48	Austrian corn silage
Lacticaseibacillus zeae subsp. silagei	DSM 116376T = EB0058T = NCIMB 15474T	ASM3077033v1	GCF_030770335.1	NZ_CP132484.1	3.04636	48	Austrian corn silage
CORE-BASED PHYLOGENOMICS (PhyloPhlan)
Lacticaseibacillus casei	DSM 20011T = JCM 1134T = ATCC 393T	ASM82905v1	GCF_000829055.1	NZ_AP012544.1	2.92493	48	Cheese
Lacticaseibacillus casei	MGb0470	ASM1547609v1	GCF_015476095.1	NZ_CP064303.1	2.94091	48	Kimchi
Lacticaseibacillus casei	LC5	ASM219221v1	GCF_002192215.1	NZ_CP017065.1	3.13287	48	Commercial dietary supplements
Lacticaseibacillus casei	N	ASM1910758v1	GCF_019107585.1	NZ_CP077759.1	2.99995	48	Fermented milk
Lacticaseibacillus casei	FBL6	ASM1836309v1	GCA_018363095.1	NZ_CP017065.1	3.13287	48	Raw milk
Lacticaseibacillus rhamnosus	DSM 20021T = JCM 1136T = NBRC 3425T	ASM143540v1	GCF_001435405.1	na	2.9491	45.92	Unknow
Lacticaseibacillus rhamnosus	GG	ASM335345v1	GCF_003353455.1	NZ_CP031290.1	3.01012	46.5	Fecal samples from a healthy adult
Lacticaseibacillus zeae subsp. zeae	DSM 20178T = KCTC 3804T	ASM143374v1	GCF_001433745.1	na	3.12134	47.74	Macerated corn liqueur
Lacticaseibacillus zeae subsp. zeae	FBL8	ASM1836305v1	GCF_018363055.1	na	3.13252	47.8	Raw milk
Lacticaseibacillus zeae subsp. zeae	MGYG-HGUT-02383	na	GCF_902386575.1	na	3.00103	48	Human gut
Lacticaseibacillus zeae subsp. zeae	DSM 20178T = KCTC 3804T	ASM143374v1	GCF_001433745.1	na	3.12134	47.74	Macerated corn liqueur
Lacticaseibacillus zeae subsp. zeae	CRBIP24.58	ASM579600v1	GCF_005796005.1	na	3.09086	48	Pus (Homo sapiens)
Lacticaseibacillus zeae subsp. zeae	CRBIP24.44	ASM579604v1	GCF_005796045.1	na	3.08327	48	Throat (Homo sapiens)
Lacticaseibacillus huelsenbergensis	DSM 115425T = HO 1656T	ASM2972635v1	GCF_029726355.1	NZ_CP120687.1	3.09433	48	Austrian corn silage
Lacticaseibacillus huelsenbergensis	DSM 115424	ASM2974879v1	GCF_029748795.1	NZ_CP120688.1	3.13403	48	Austrian grass silage
Lacticaseibacillus parahuelsenbergensis	DSM 116105T =LD0937T	ASM3077026v1	GCF_030770265.1	NZ_CP132482.1	3.05587	48	Austrian grass silage
Lacticaseibacillus styriensis	DSM 116297T = SCR0063T= NCIMB 15473T	ASM3077029v1	GCF_030770295.1	NZ_CP132483.1	3.13405	48	Austrian corn silage
Lacticaseibacillus styriensis	MRD1975	ASM4840682v1	GCF_048406825.1	NZ_CP178534.1	3.10431	48	Milk
Lacticaseibacillus zeae subsp. silagei	DSM 116376T = EB0058T = NCIMB 15474T	ASM3077033v1	GCF_030770335.1	NZ_CP132484.1	3.04636	48	Austrian corn silage
Lacticaseibacillus zeae subsp. silagei	CECT9104	LS991421.1	GCF_900492555.1	NZ_LS991421.1	3.04576	48	Faeces of baby
Lacticaseibacillus zeae subsp. silagei	SCR0080 = NCIMB 15475	ASM3077031v1	GCF_030770315.1	NZ_CP132485.1	3.07381	48	Austrian corn silage
Lacticaseibacillus zeae subsp. silagei	UD2202	ASM2887821v1	GCF_028878215.1	na	3.03878	48	Dairy product
Lacticaseibacillus paracasei subsp. paracasei	DSM 5622T	ASM143638v1	GCF_001436385.1	na	2.88196	46.5	na
Lacticaseibacillus paracasei subsp. tolerans	DSM 20258T	ASM143648v1	GCF_001436485.1	na	2.38324	46.5	Pasteurized milk
Lacticaseibacillus paracasei	BL23	AASM2648v1	GCF_000026485.1	NC_010999.1	3.0792	46.5	Cheese
PAN-GENOME ANALYSIS (EDGAR3.0 pipeline)
Lacticaseibacillus zeae subsp. zeae	DSM 20178T = KCTC 3804T	ASM143374v1	GCF_001433745.1	na	3.12134	47.74	Macerated corn liqueur
Lacticaseibacillus zeae subsp.zeae	FBL8	ASM1836305v1	GCF_018363055.1	na	3.13252	47.8	Raw milk
Lacticaseibacillus huelsenbergensis	DSM 115425T = HO 1656T =NCIMB 15466T	ASM2972635v1	GCF_029726355.1	NZ_CP120687.1	3.09433	48	Croatian corn silage
Lacticaseibacillus parahuelsenbergensis	DSM 116105T = LD0937T = NCIMB 15471T	ASM3077026v1	GCF_030770265.1	NZ_CP132482.1	3.05587	48	Austrian grass silage
Lacticaseibacillus styriensis	DSM 116297T = SCR0063T = NCIMB 15473T	ASM3077029v1	GCF_030770295.1	NZ_CP132483.1	3.13405	48	Austrian corn silage
Lacticaseibacillus zeae subsp. silagei	DSM 116376T = EB0058T = NCIMB 15474T	ASM3077033v1	GCF_030770335.1	NZ_CP132484.1	3.04636	48	Austrian corn silage

## Sheet: TableS2_Protein sequences
Supplementary Table S2. Protein sequences of experimentally verified proteolytic system members were derived from the non-redundant protein database Uniprot
	Family	Peptidase	Uniprot Organism	ENTRY Uniprot	Sequence	Length (AA)	PROTEIN SEQUENCE Genbank	Note
Cell-wall bound proteinase	peptidase S8 family Peptidases_S8_C5a	PrtP	Lacticaseibacillus paracasei (Lactobacillus paracasei)	Q02470 · P2P_LACPA	MQRKKKGLSILLAGTVALGALAVLPVGEIQAKAAISQQTKVSSLANTVKAATAKQAATDTTAATTNQAIATQLAAKGIDYNKLNKVQQQDTYVDVIVQMSAAPASENGTLRTDYSSTAEIQQETNKVIAAQASVKAAVEQVTQQTAGESYGYVVNGFSTKVRVVDIPKLKQIAGVKTVTLAKVYYPTDAKANSMANVQAVWSNYKYKGEGTVVSVIDTGIDPTHKDMRLSDDKDVKLTKYDVEKFTDTAKHGRYFTSKVPYGFNYADNNDTITDDTVDEQHGMHVAGIIGANGTGDDPTKSVVGVAPEAQLLAMKVFTNSDTSATTGSATLVSAIEDSAKIGADVLNMSLGSDSGNQTLEDPEIAAVQNANESGTAAVISAGNSGTSGSATQGVNKDYY…	1902	AAA25248.1	Cloning, sequencing and expression of the gene encoding the cell-envelope- associated proteinase from Lactobacillus paracasei subsp. paracasei NCDO 151 di Holck A., Naes H. e Purification and N-terminal amino acid sequence determination of the cell- wall-bound proteinase from Lactobacillus paracasei subsp. paracasei. di Naes H., Nissen-Meyer J.
Cell-wall bound proteinase	peptidase S8 family Peptidases_S8_C5a	PrtP	Lacticaseibacillus paracasei (Lactobacillus paracasei)	I1Z732 · I1Z732_LACPA	AISQQTKGSSLANTVKAATAKQAATDTTAATTNQAIATQLAAKGIDYNKLNKVQQQDIYVDVIVQMSAAPASENGIRTDYSSTAEIQQETNKVIAAQASVKAAVEQVTQQTAGESYGYVVNGFSTKVRVVDIPKLKQIAGVKTVTLAKVYYPTDAKANSMANVQAVWSNYKYKGEGTVVSVIDTGIDPTHKDMRLSDDKDVKLTKSDVERFTDTAKHGRYFTSKVPYGFNYADNNDTITDDTVDEQHGMHVAGIIGANGTGDDPTKSVVGVAPEAQLLAMKVFTNSDTSATTGSATLVSAIEDSAKIGADVLNMSLGSDSGNQTLEDPEIAAVQNANESGTAAVISAGNSGTSGSATEGVNKDYYGLQDNEMVGTPGTSRGATTVASAENTDVISQAVT…	1836	AFJ15092.1	Lactocepin secreted by Lactobacillus exerts anti-inflammatory effects by selectively degrading proinflammatory chemokines. di von Schillde M.A., Hormannsperger G., Weiher M., Alpert C.A., Hahne H., Bauerl C., van Huynegem K., Steidler L., Hrncir T., Haller D.
Cell-wall bound proteinase	peptidase S8 family Peptidases_S8_C5a	PrtP	Lacticaseibacillus casei (strain BD-II) (Lactobacillus casei)	A0A806E6B3 · A0A806E6B3_LACCD	MQRKKKGLSILLAGTVALGALAVLPVGEIQAKAAISQQTKGSSLANTVKATTAKQAATDTTAATTNQAIATQLAAKGIDYNKLNKVQQQDTYVDVIVQMSAAPASENGTLRTDYSSTAEIQQETNKVIAAQASVKAAVEQVTQQTAGESYGYVVNGFSTKVRVVDIPKLKQIAGVKTVTLAKVYYPTDAKANSMANVQAVWSNYKYKGEGTVVSVIDTGIDPTHKDMRLSDDKDVKLTKSDVERFTDTAKHGRYFTSKVPYGFNYADNNDTITDDTVDEQHGMHVAGIIGANGTGDDPTKSVVGVAPEAQLLAMKVFTNSDTSATTGSATLVSAIEDSAKIGADVLNMSLGSDSGNQTLEDPEIAAVQNANESGTAAVISAGNSGTSGSATQGVNKDYY…	1902	AEA57945.1	Complete genome sequence of the probiotic strain Lactobacillus casei BD- II di Ai L., Chen C., Zhou F., Wang L., Zhang H., Chen W., Guo B.
Cell-wall bound proteinase	peptidase S8 family Peptidases_S8_C5a	PrtP	Lacticaseibacillus casei (Lactobacillus casei)	I1Z733 · I1Z733_LACCA	AISQQTKGSSLANTVKATTAKQAATDTTAATTNQAIATQLAAKGIDYNKLNKVQQQDTYVDVIVQMSAAPASENGTLRTDYSSTAEIQQETNKVIAAQASVKAAVEQVTQQTAGESYGYVVNGFSTKVRVVDIPKLKQIAGVKTVTLAKVYYPTDAKANSMANVQAVWSNYKYKGEGTVVSVIDTGIDPTHKDMRLSDDKDVKLTKSDVERFTDTAKHGRYFTSKVPYGFNYADNNDTITDDTVDEQHGMHVAGIIGANGTGDDPTKSVVGVAPEAQLLAMKVFTNSDTSATTGSATLVSAIEDSAKIGADVLNMSLGSDSGNQTLEDPEIAAVQNANESGTAAVISAGNSGTSGSATQGVNKDYYGLQDNEMVGTPGTSRGATTVASAENTDVISQAV…	1837	AFJ15093.1	Lactocepin secreted by Lactobacillus exerts anti-inflammatory effects by selectively degrading proinflammatory chemokines. di von Schillde M.A., Hormannsperger G., Weiher M., Alpert C.A., Hahne H., Bauerl C., van Huynegem K., Steidler L., Hrncir T., Haller D.
Cell-wall bound proteinase	peptidase S8 family Peptidases_S8_C5a	PrtP	Lacticaseibacillus casei (Lactobacillus casei)	A0A8F7CH98 · A0A8F7CH98_LACCA	GIDYHKLNKVQQQDTYVDVIVQMSAAPASENGTLKTDYSSTAEIQQKTSKVIAAQASVKAAVEQVTHQAAGESYGYVVNGFTTKVRVADIPQLKQIAGVKTVTLAKVYYPTDAKANSMANVQAVWSNYKYKGEGTVVSVIDTGIDPTHKDMRLSDAKKAKLKRADVEQFTKTAKHGRYFTDKVPYGFNYADNNDTITDDTVDEQHGMHVAGIIGANGTGSDPTKSVVGVAPESQLLAMKVFTNSDTSATTGSSTLVSAIEDSAKLGADVLNMSLGSVSGNQTLADPEIAAVQNANESGTAAVISAGNSGTSGSATEGVNKDYYGLQDNETVGSPGTARGATTVASAENTDVIGQSATITDGSGLKLGPETIQLSSNDFIDRFDKKKFYVVKDATGKLSI…	842	QXU69635.1	Characterization of cell-envelope proteinases from two Lacticaseibacillus casei strains isolated from Parmigiano Reggiano cheese. di Solieri L., Sola L., Martini S., Vaccalluzzo A., Randazzo C.L., Tagliazucchi D.
Cell-wall bound proteinase	peptidase S8 family Peptidases_S8_C5a	PrtP	Lacticaseibacillus casei (Lactobacillus casei)	A0A8F7CHA0 · A0A8F7CHA0_LACCA	DYHKLNKVQQQDTYVDVIVQMSAAPASENGTLKTDYSSTAEIQQKTSKVIAAQASVKAAVEQVTHQAAGESYGYVVNGFTTKVRVADIPQLKQIAGVKTVTLAKVYYPTDAKANSMANVQAVWSNYKYKGEGTVVSVIDTGIDPTHKDMRLSDAKKAKLKRADVEQFTKTAKHGRYFTDKVPYGFNYADNNDTITDDTVDEQHGMHVAGIIGANGTGSDPTKSVVGVAPESQLLAMKVFTNSDTSATTGSSTLVSAIEDSAKLGADVLNMSLGSVSGNQTLADPEIAAVQNANESGTAAVISAGNSGTSGSATEGVNKDYYGLQDNETVGSPGTARGATTVASAENTDVIGQSATITDGSGLKLGPETIQLSSNDFIDRFDKKKFYVVKDATGKLSIGG…	839	QXU69634.1	Characterization of cell-envelope proteinases from two Lacticaseibacillus casei strains isolated from Parmigiano Reggiano cheese. di Solieri L., Sola L., Martini S., Vaccalluzzo A., Randazzo C.L., Tagliazucchi D.
Cell-wall bound proteinase	peptidase S8 family Peptidases_S8_C5a	PrtP	Lacticaseibacillus rhamnosus (strain LMS2-1)	C2JZ55 · C2JZ55_LACRM	MQTKRKGLSILLASTVALGALSVLPIGEVQAKAAISQQTKGTNLAEAKTASAGRTAKDTTSAVTNQAIATQLAAKGIDYNKLNKVQQQDTYVDVIVQMSAAPASENGTLKPDYSSTAEIQQATNQVIAAQASVKSAVEQVTHQTAGESYGYVVNGFTTKVKVADIPRLKQIPGVKTVTLAKVYYPTDAKANSMANVQAVWSNYKYKGEGTVVSVIDTGIDPNHKDMRLSDTKKAKLTRTDVEKFTSTAKHGRYFTAKVPYGFNYADNNDTITDDTVDEQHGMHVSGIIGANGTGDDPTKSVVGVAPESQLLAMKVFTNSDTSATTGSSTLVSAIEDSAKLGADVLNMSLGSVSGNQTLEDPEIAAVQNANESGTAAVISAGNSGTSGSGTEGVNKDYYG…	1973	EEN79682.1
Cell-wall bound proteinase	peptidase S8 family Peptidases_S8_C5a	PrtP	Lactobacillus helveticus (Lactobacillus suntoryeus)	A0A3S8SEC4 · A0A3S8SEC4_LACHE	MRNSTAPNGNRNFSFVFKAKGRLEDIETQKRARTIINVRKKWVAAAIIALASGSTVFLSQNTAEAATNDPGASDVQVKVVQQDQKQDQNSTANAAVSNSDSAKTQTNATDQTQNSTVVSGDSTTANSKTSQTSNAQTTSTTTNSVDPNQEQQPANQADHVKGNVQSAWDQGYRGQGTVVAVIDSGADPTHKDFQTMPEDPKLSKDDMQAKIAKQGYGKYVNEKFPYVYNYADRDNDYITSDDINANDSPHGQHVSGIIAADGKPDGNKEYVVGVAPEAQLMQLRVFGQFSDEKTDDVAKAIYDATNLGADVIQMSLGQGVADQQLTNIEQKAVQYAIDHGVFVSISASNNGNSASVDNPSKVKDQGYQSGSQAGNYEPLNSSTVANPGVSKNALTVAAE…	1667	AZK92169.1	Complete genome sequence of Lactobacillus helveticus. di Kim J.F., Chung Y., Kwak M.
Cell-wall bound proteinase	peptidase S8 family Peptidases_S8_C5a	PrtP	Lactobacillus helveticus (Lactobacillus suntoryeus)	A0A2X0QTZ4 · A0A2X0QTZ4_LACHE	MRNSTAPNGNRNFSFVFKAKGRLEDIETQKRARTIINVRKKWVAAAIIALASGSTVFLSQNTAEAATNDPGASDVQVKVVQQDQKQDQNSTANAAVSNSDSAKTQTNATDQTQNSTVVSGDSTTANSKTSQTSNAQTTSTTTNSVDPNQEQQPANQADHVKGNVQSAWDQGYRGQGTVVAVIDSGADPTHKDFKTMPEDPKLSEDDMQAKIAKQGYGKYVNEKFPYVYNYADRDNDYITSDDTNANDSPHGQHVSGIIAADGKPDGNKEYVVGVAPEAQLMQLRVFGQFSDEKTDDVAKAIYDATNLGADVIQMSLGQGVADQQLTNIEQKAVQYAIDHGVFVSISASNNGNSASVDNPSKVKDQGYQSGSQAGNYEPLNSSTVANPGVSKNALTVAAE…	1658	GFP12480.1 o SPB22483.1	Draft genome sequence of Lactobacillus helveticus strain JCM 1062. di Endo A., Maeno S., Kido Y.
Cell-wall bound proteinase	peptidase S8 family Peptidases_S8_C5a	PrtP	Lactobacillus helveticus (Lactobacillus suntoryeus)	A0A2X0RBZ4 · A0A2X0RBZ4_LACHE	MERSKYVGTLLCAAALSCIPAFTTAENNVKASVESQTKSSKKAATTVKTTTTGVTQKAIEAQLAAKGVAFKHLTPKQKQDVYVDVIIQLKSAPAATNGSIKANASSAEIEQASKQVIASQSTVKSQVKAITKQAIGKSYGYVVNGFATKAKVKDIQKLRKLPGVKSVTLAKVYYANDSSADNMANVSTVWNNYKYKGQGTVVSIIDTGIDPNHKDLRLSDDKQAKLSQKDVADFTKKAGYGRYFTDKVPYGHNYADNNEKITDDDPSEQHGMHVSGIVAANGTSNNTKSVVGVAPEAQLLAMKVFSNSDSSATTDSTSIIGAIDDSAKLHADVLNMSLGSTSGEQTGNDPEIAAVDRATKEGTAAVISAGNAGTTNSESEGNNKAYYGNPDMETVGTPG…	2011	GFP12550.1 o SPB25351.1	Draft genome sequence of Lactobacillus helveticus strain JCM 1062. di Endo A., Maeno S., Kido Y.
Cell-wall bound proteinase	peptidase S8 family Peptidases_S8_C5a	PrtP	Lactobacillus helveticus CIRM-BIA 953	U4QGL1 · U4QGL1_LACHE	MKGKSNYNSIDYSYVFSAKKKLELEHSKKSATNFGRMKNKWTAAAAIALASGSVVLFVPTGNAQAAEADASVKTEKVETNKQADQNVAAEGDANKADGAVADQEQQKQAQQPLQDEDDDDQTDQDTPDQPVGQDDLDEDYYKSQDQPVNTPDHIKGNVQDAWDQGYKGEGIAVAVIDSGVDPSHKDFQTAPTNPKFSKEDMEKIIKKLGHGRYVSPKFPYVHDVDTGDDDGIKENTEKANTEGSHGQHVAGIIGHADNQNDKYVVGIAPEAQLIFFKDIGINGDNQIAAGIYDAVKVGADVISISLDNNLYVQDLGDADQKAIQYATDHGVVVSIAASNDGNSASVDGVWGKKRIYSPGSDAGNYQPFNSGTIPTPALSKNAITVAAENSAIGEHNEIG…	873	CDI43727.1	Draft Genome Sequence of five Lactobacillus helveticus strains CIRM-BIA 101T, 103, 104, 951 and 953 isolated from milk product. di Valence F., Chuat V., Ma L., Creno S., Falentin H., Lortal S., Bizet C., Clermont D., Loux V., Cousin S.
Cell-wall bound proteinase	peptidase S8 family Peptidases_S8_C5a	PrtP	Lactobacillus helveticus CIRM-BIA 953	U4QGD6 · U4QGD6_LACHE	MPNGITKSPRIGVDNLVKKGFYNRETGEFTVTGRVNPDKVVKLVAITQSNSENDKQNLVTFDKASNFKFKFRAPIKAGEKAVKYIYTTKDGNKVSGLFIWEMDEEEPTLDLEIPSVTNQPVLHISGIANDNEDGYRVFVDGDNVFTQRSSGNNVNYYPESDQSMNPNGPYTINYDINLDDNNGKPTDHIITVEVDDKLGNVTQKKFNVHFDPNYTGQSEFIPGENIPSPSEEPKVEQPVVPHTNETTNNTDNLDNAITLTLTHNAFVYDANGNVVITDGKNTLLEKSNTISAWHKGQITTLAGKKYV	307	CDI43728.1	Draft Genome Sequence of five Lactobacillus helveticus strains CIRM-BIA 101T, 103, 104, 951 and 953 isolated from milk product. di Valence F., Chuat V., Ma L., Creno S., Falentin H., Lortal S., Bizet C., Clermont D., Loux V., Cousin S.
Cell-wall bound proteinase	peptidase S8 family Peptidases_S8_C5a	PrtP	Lactobacillus helveticus CIRM-BIA 104	U6FBD9 · U6FBD9_LACHE	MPNGITKSPRIGVDNLVKKGFYNRETGEFTVTGRVNPDKVVKLVAITQSNSENDKQNLVTFDKASNFKFKFRAPIKAGEKAVKYIYTTKDGNKVSGLFIWEMDEEEPILDLEIPSVTNQPVLHISGIANDNEDGYRVFVDGNNVFTQRSSGNNVNYYPESDQSMNPYGPYTINYDINLDDNNGKSTDHIITVEVDDKLGNVTQKKFNVHFDPNYTGQSEFIPGENIPSPSEEPKVDQPVVPHTNETTNNTYNLDNAITLTLTHNAFVYDTNGNVVITDGKNTLLEKGNTISAWHKGQITTLAGKKYV	307	CDI60350.1	Draft Genome Sequence of five Lactobacillus helveticus strains CIRM-BIA 101T, 103, 104, 951 and 953 isolated from milk product. di Valence F., Chuat V., Ma L., Creno S., Falentin H., Lortal S., Bizet C., Clermont D., Loux V., Cousin S.
Cell-wall bound proteinase	peptidase S8 family Peptidases_S8_C5a	PrtP	Lactobacillus helveticus CIRM-BIA 951	U6F2Y7 · U6F2Y7_LACHE	MLSAAVCGQIFTSPTPDQIYAAIKAVNQGQGVFLVVKLVAITQSNSENDKQNLVTFDKASNFKFKFRAPIKAGEKAVKYIYTTKDGNKVSGFFIWEMDEEEPTLDLEIPSVTNQPVLHISGIANDNEDGYRVFVDGDNVFTQRSSGNNVNYYPESDQSMNPYGPYTINYDINLDDNNGKPTDHIITVEVDDKLGNVTQKKFNVHFDQNYTGQSEFIPGENIPSPSEEPKVDQPVVSHTNETTNNTDNLDNAITLTLTHNAFVYDANGNVVITDGKNTLLEKGNTISAWHKGQITTFAGKKYV	302	CDI57598.1	Draft Genome Sequence of five Lactobacillus helveticus strains CIRM-BIA 101T, 103, 104, 951 and 953 isolated from milk product. di Valence F., Chuat V., Ma L., Creno S., Falentin H., Lortal S., Bizet C., Clermont D., Loux V., Cousin S.
Cell-wall bound proteinase	peptidase S8 family Peptidases_S8_C5a	PrtP	Lactobacillus helveticus CIRM-BIA 104	U6FCZ9 · U6FCZ9_LACHE	MRNSTAPNGNRNFSFVFKAKGRLEDIETQKRARTIINVRKKWVAAAIIALASGSTVFLSQNTAEAATNDPGASDVQVKVVQQDQKQDQNSTANAAVSNSDSAKTQTNATDQTQNSTVVSGDSTTANSKTSQTSNAQTTSTTTNSVDPNQEQQPANQADHVKGNVQSAWDQGYRGQGTVVAVIDSGADPTHKDFKTMPEDPKLSEDDMQAKIAKQGYGKYVNEKFPYVYNYADRDNDYITSDDTNANDSPHGQHVSGIIAADGKPDGNKEYVVGVAPEAQLMQLRVFGQFSDEKTDDVAKAIYDATNLGADVIQMSLGQGVADQQLTNIEQKAVQYAIDHGVFVSISASNNGNSASVDNPSKVKDQGYQSGSQAGNYEPLNSSTVANPGVSKNALTVAAE…	301	CDI60441.1	Draft Genome Sequence of five Lactobacillus helveticus strains CIRM-BIA 101T, 103, 104, 951 and 953 isolated from milk product. di Valence F., Chuat V., Ma L., Creno S., Falentin H., Lortal S., Bizet C., Clermont D., Loux V., Cousin S.
Cell-wall bound proteinase	peptidase S8 family Peptidases_S8_C5a	PrtP	Lactobacillus helveticus (Lactobacillus suntoryeus)	A0A386RD04 · A0A386RD04_LACHE	MVTFDKVSNFKFKFRAPIKAGEKAVKYIYTTKDGNKVSGLFIWEMDEEEPTLDLEIPSVTNQPVLHISGIANDNEDGYRVFVDGNNVFTQRSSGNNVNYYLESDQSMNPYGPYTINYDINLDDNNGKSTDHIITVEVDDKLGNVTQKKFNVHFDPNYTGQSEFIPGENIPSPSEEPKVDQPVVPHTNETTNNTYNLDNAITLTLTHNAFVYDTNGNVEITDGKNTLLEKGNTISAWHKGQITTLAGKKYV	250	AYE61016.1	Complete genomic sequencing of Lactobacillus helveticus LH99 and comparative genome analysis. di Li N., You C., Liu Z.
Cell-wall bound proteinase	peptidase S8 family Peptidases_S8_C5a	PrtR	Lacticaseibacillus paracasei NRIC 1981	A0A829TSE9 · A0A829TSE9_LACPA	MNRVKPFSQEKRRYKMYKSGRHWVYSAIVTFGAASFLMMQPAQGVSADAAAPPTTTQTKSNQAAPDAASADSPVSKPASATTGQVTSSADTPTTTAASATPTATAKPATPAPVTSQAKPEASAKAKQPTQPTSVTPSTPATTNTKTAQKTVSQPAQKAPAAPAKPAPIAKPAPTSNPENKASLTKGNVQPLWDQNIKGQGMVAAVIDQGVEPHPDFRLSDAKTAALSEDQVKAFTASHGYGDYVNEKIPFFYDYTNNVNENLKFDTSNHGQHLAGIIAANGQPSDSKKYVTGIAPEAQLLSMKILGKSSSDSLNNAARAIYDAVDLGANAINISFGMGVDIDDPTAEGQAAIKFATDHGVFVTVATGNNGHAGGIYDKSASNGITTSYQPANASTLTTP…	2231	GAN41075.1	Genome Sequences of Three Strains of Lactobacillus paracasei of Different Origins and with Different Cholate Sensitivities. di Shiwa Y., Atarashi H., Tanaka N., Okada S., Yoshikawa H., Endo A., Miyaji T., Nakagawa J.
Cell-wall bound proteinase	peptidase S8 family Peptidases_S8_C5a	PrtR	Lacticaseibacillus paracasei subsp. paracasei 8700:2	A0A826HSS8 · A0A826HSS8_LACPA	MNRVKPFSQEKRRYKMYKSGRHWVYSAIVTFGAASFLMMQPAQGVSADAAAPPPTTQTKSNQAAPDAASADSPVSKPASATTGQVTSSADTPTTTAASATPTATAKSATPAPVASQAKPEASAKAKQPTQPTSVTPSTPTTTNTKTAQKTVSQPAQKAPAAPAKPAPIAKPAPTSNPENKASLTKGNVQPLWDQNIKGQGMVAAVIDQGVEPHQDFRLSDAKTAALSEDQIKAFTASHGYGDYVNEKIPFFYDYTNNVNENLKFDTSNHGQHLAGIIAANGQPSDSKKYVTGIAPEAQLLSMKILGKSSSDSLNNAARAIYDAVDLGANAINISFGMGVDIDDPTAEGQAAIKFATDHGVFVTVATGNNGHAGGIYDKSASNGITTSYQPANASTLTTP…	2178	EEQ67197.1	The Genome Sequence of Lactobacillus paracasei subsp. paracasei strain 8700:2. di Ward D., Earl A., Feldgarden M., Young S.K., Gargeya S., Zeng Q., Alvarado L., Berlin A., Bochicchio J., Birren B.
Cell-wall bound proteinase	peptidase S8 family Peptidases_S8_C5a	PrtR	Lacticaseibacillus paracasei NRIC 0644	A0A0C9Q0Q9 · A0A0C9Q0Q9_LACPA	MVAAVIDQGVEPHQDFRLSDAKTAALSEDQIKAFTASHGYGDYVNEKIPFFYDYTNNVNENLKFDTSNHGQHLAGIIAANVQPSDSKKYVTGIAPEAQLLSMKMLGKSSSDSLNNAARAIYDAVDLGANAINISFGMGVDIDDPTAEGQAAIKFATDHGVFVTVATGNNGHAGGIYDKSASNGITTSYQPANASTLTTPSATPSAMAVAAGNDVLDAKAALISASSWGPTASYKLKPDITAPGEKVASTLLNDGLGKVSGTSQANAYVTGASLLVMQNLKRSTNLTGAQLVKAVKLALMNAANPILDINYPGQIISPRRQGAGQIDVAKAANLTVSAEGTDDAGFVSLQQFTGSKSFVITLENRGTDQQTYTLDLGQPATEVIDTANNKTVHDRTLPGA…	2033	GAN37999.1	Whole genome sequencing of Lactobacillus casei NRIC0644. di Atarashi H., Yoshida Y., Fujimura S., Tanaka N., Shiwa Y., Yoshikawa H., Okada S., Nakagawa J.
Cell-wall bound proteinase	peptidase S8 family Peptidases_S8_C5a	PrtR	Lacticaseibacillus paracasei subsp. paracasei 8700:2	A0A806KMB4 · A0A806KMB4_LACPA	MYKLNPFSQEKRRYKMYKAGRHWVYSAIAVLGGAGILMFQPTQTVFADEASPTASATTLAKPHTELKDKQPVTASPTPTDNPQPSVDKPAVLAIETQPTSAANQVEAPSAKPADHSKAASDSHAASIVSATPTPTPKTAPVATDKVKVTVPVETPASPVMAPTASPRSAVQTKPTPAPAKPPINQAVLTKGNVQPLWDENIKGQGMVAAVIDSAIEPHDMLRLSDNTTAKISKETIADFAASHGYGTYLNDKLPFFYDYTTNSNTNLHLDNHIQGEQVAGIIAGNGQERPDGRYILGVAPEAQILSMKVLGQAKSLTTNNVARAVYDAVALGADVIYLSLAKIVDVEDPTAEDQAAIQFATDHGVLVIKTTSNNGNAMAIHGTSVPGGTTAGYITTNDS…	1809	AGT63635.1	The Genome Sequence of Lactobacillus paracasei subsp. paracasei strain 8700:2. di Ward D., Earl A., Feldgarden M., Young S.K., Gargeya S., Zeng Q., Alvarado L., Berlin A., Bochicchio J., Birren B.
Cell-wall bound proteinase	peptidase S8 family Peptidases_S8_C5a	PrtR	Lacticaseibacillus paracasei subsp. paracasei 8700:2	A0AAP9HG06 · A0AAP9HG06_LACPA	MYKLNPFSQEKRRYKMYKAGRHWVYSAIAVLGGAGILMFQPTQTVFADEASPTASATTLAKPHTELKDKQPVTASPTPTDNPQPSVDKPAVLAIETQPTSAANQVEAPSAKPADHSKAASDSHAASIVSATPTPTPKTAPVATDKVKVTVSVETPASPVMAPTVAPRSAVQTKPTPAPAKPPINQAVLTKGNVQPLWDENIKGQGMVAAVIDSAVEPHDMLRLSDNTTAKISKETIADFAASHGYGTYLNDKLPFFYDYTTNSNTNLHLDNHIQGEQVAGIIAGNGQERPDGRYILGVAPEAQILSMKVLGQTKSLTTNNVARAVYDAVALGADVIYLSLVKTVDVEDPTAEDQAAIQFATDHGVLVIKTTSNNGNAMAIHGTSVPGGTTAGYITTNDS…	1806	QGV17119.1	Genome sequence, comparative genomics and functional analysis of the highly adhesive Lactobacillus paracasei Kobulty strain. di Koryszewska-Baginska A., Grynberg M., Aleksandrzak-Piekarczyk T.
Cell-wall bound proteinase	peptidase S8 family Peptidases_S8_C5a	PrtR	Lacticaseibacillus paracasei NRIC 0644	A0A0C9QHR6 · A0A0C9QHR6_LACPA	MQPLWDENIKGQGMVAAVIDSAVEPHDMLRLSDNTTAKISKETIADFAASHGYGTYLNDKLPFFYDYTTNSNTNLHLDNHIQGEQVAGIIAGNGQERPDGRYILGVAPEAQILSMKVLGQAKSLTTNNVARAVYDAVALGADVIYLSLAKIVDVEDPTAEDQAAIQFATDHGVLVIKTTSNNGNAMAIHGTSVPGGTTAGYITTNDSTLSLTGGGLSALTVASENSALGTKSAMAYNSSWGPTTDYKLKPDLTTPGEKSVSIGKNNALATKSGTAAASAYAAGAGLLVMQHLKQTTKLTGVELVKAVKLALMNAATPMMDHDYQGNFVSPRRQGAGQIDVAKASGLTVTAEGTDQTGSVSLQQFEAAPTFTITLTNHGTTDQTYTVVPGHPLTQTFDTA…	1617	GAN37998.1	Whole genome sequencing of Lactobacillus casei NRIC0644. di Atarashi H., Yoshida Y., Fujimura S., Tanaka N., Shiwa Y., Yoshikawa H., Okada S., Nakagawa J.
Cell-wall bound proteinase	peptidase S8 family Peptidases_S8_C5a	PrtR	Lacticaseibacillus casei (Lactobacillus casei)	A0A8F7CHC1 · A0A8F7CHC1_LACCA	LKPDISAPGDNVTSTAIDPTTNTQTYAVESGTSMAGPFNAGAALLVMQKIKATQPDLTGADLVKAVKLALMNAAEPMKDINYPDTYISPRRQGAGQIDVAKAGDLTVSAEGSNDAGSVSLGKIGKTTTFTVTLTNHGKTAQNYTVDTNGGPLTQVRDASNGNTVHDETLVGATVNTDTANFTLAAGETKQVTFKLSLDDSVAANQLVEGYLTFKATDAAQTISVPYLGYYGDLTDEQVIDAPANSGESIFNGGYLVDNNNNPLGVTDAASLSNLVNTDTTGKYTWTLVPTYVDNKKVSFSPNGDGASDTVFPYVFSKQNLKSVTIQILDAQGHVVRVLDKENNTSKSYLQNGNSFNSDLGLSTDMRLDPTAFTWDGKVYDQATGKYVTAPDGKYTYRLV…	543	QXU69636.1	Characterization of cell-envelope proteinases from two Lacticaseibacillus casei strains isolated from Parmigiano Reggiano cheese. di Solieri L., Sola L., Martini S., Vaccalluzzo A., Randazzo C.L., Tagliazucchi D.
Cell-wall bound proteinase	peptidase S8 family Peptidases_S8_C5a	PrtR	Lacticaseibacillus casei (Lactobacillus casei)	A0A8F7CI72 · A0A8F7CI72_LACCA	PDISAPGDNVTSTAIDPTTNTQTYAVESGTSMAGPFNAGAALLVMQKIKATQPDLTGADLVKAVKLALMNAAEPMKDINYPDTYISPRRQGAGQIDVAKAGDLTVSAEGSNDAGSVSLGKIGKTTTFTVTLTNHGKTAQNYTVDTNGGPLTQVRDASNGNTVHDETLVGATVNTDTANFTLAAGETKQVTFKLSLDDSVAANQLVEGYLTFKATDAAQTISVPYLGYYGDLTDEQVIDAPANSGESIFNGGYLVDNNNNPLGVTDAASLSNLVNTDTTGKYTWTLVPTYVDNKKVSFSPNGDGASDTVFPYVFSKQNLKSVTIQILDAQGHVVRVLDKENNTSKSYLQNGNSFNSDLGLSTDMRLDPTAFTWDGKVYDQATGKYVTAPDGKYTYRLVTE…	540	QXU69637.1	Characterization of cell-envelope proteinases from two Lacticaseibacillus casei strains isolated from Parmigiano Reggiano cheese. di Solieri L., Sola L., Martini S., Vaccalluzzo A., Randazzo C.L., Tagliazucchi D.
Cell-wall bound proteinase	peptidase S8 family Peptidases_S8_C5a	PrtR	Lacticaseibacillus rhamnosus (Lactobacillus rhamnosus)	Q8GC13 · Q8GC13_LACRH	MYKAGSRWMTAAIITFGTSLVVLGGTATQSVSADTKTPTADKTTQPVNQAQTQTATSTASSQATTADAKDKTAETQPTTTTTTKQVTAQSQAAPSTATKAQSQASTTNQAQPAAATKVQTGTPSSGANTQPAANTATTKSATSTTSSAATQSAAPASNAATTNAAKTQSTAATTTDPGPANQDTLTKGNVKGLWNEGYQGQGMVVAVIDSGVQAHDDLRLSDDSTAAITKEKAEAAISKLGYGSYVNSKIPFAYDYVNNDSVNTGTTVAGSTHGEHVAGIIAANGTTADGATGNEKATTYVKGVAPEAQILAMQVIDEFADENANDISRAIRDAVTLGANAIQMSLGIGVTEQDLTDEEQAAVQYATDHGVFVSISAGNNANAGSIIGSKTSNDISTAY…	1480	CAD43138.1	Identification and genetic characterization of a novel proteinase, PrtR, from the human isolate Lactobacillus rhamnosus BGT10. di Pastar I., Tonic I., Golic N., Kojic M., van Kranenburg R., Kleerebezem M., Topisirovic L., Jovanovic G.
Cell-wall bound proteinase	peptidase S8 family Peptidases_S8_C5a	PrtR	Lacticaseibacillus zeae DSM 20178 = KCTC 3804	A0A0R1EQV2 · A0A0R1EQV2_LACZE	MTAAIITFGTSLIVLGGTATQSVAADTTTEKTSQTAQSTSTQAQPAAQTTTSQATANDATSNATQTAAVKSSATQTQAAPAQNTQSSASQPQAATQQASSATAKTTAPASAATTQMNTSSTTSQATTSTAATATSQASTAATAASTATTTNQTQASSAATADPRPANQDTLTKGNVKGLWDEGYQGQGMVVAVIDSGVQPHADLRLSDDSTATLTKEKAEAAIAKLGYGTYVNSKIPFAYDYVNNDSVNTGITESGSTHGEHVAGIIAANGTTADGATGKEKASTYVKGVAREAQILAMQVIDDFPDENANDISRAIRDAVALGANAIQMSLGIGVTEQDLTDEEQAAVQYATEHGVFVSISAGNNAIAGSIIGSKTPNDISTAYAPKNDSTIGDPGAA…	1499	KRK11600.1	Expanding the biotechnology potential of lactobacilli through comparative genomics of 213 strains and associated genera. di Sun Z., Harris H.M., McCann A., Guo C., Argimon S., Zhang W., Yang X., Jeffery I.B., Cooney J.C., O'Toole P.W.
Cell-wall bound proteinase	peptidase S8 family Peptidases_S8_C5a	PrtH	Lactobacillus helveticus (Lactobacillus suntoryeus)	V5Z1S1 · V5Z1S1_LACHE	MERSKYVGTLLCAAALSCIPAFTTAENNVKASVESQTKSSKKAATTVKTTTTGVTQKAIETQLAAKGVAFKHLTPKQKQDVYVDVIIQLKSAPAATNGSIKANASSAEIEQASKQVIASQSTVKSQVKAITKQAIGKSYGYVVNGFATKAKVKDIQKLRKLPGVKSVTLAKVYYANDSSADNMANVSTVWNNYKYKGQGTVVSIIDTGIDPNHKDLRLSDDKQAKLSQKDVADFTKKAGYGRYFTDKVPYGHNYADNNEKITDDDPSEQHGMHVSGIVAANGTSNNTKSVVGVAPEAQLLAMKVFSNSDSSATTDSASIIGAIDDSAKLHADVLNMSLGSTSGEQTDNDPEIAAVDRATKEGTAAVISAGNAGTTNSESEGNNKAYYGNPDMETVGTPG…	2011	BAO23451.1	Lactobacillus helveticus isolated from the traditional fermented milk "airag" in Mongolia are generally and phenotypically indigenous. di Miyamoto M., Seto Y., Nakajima H., Brenjargal S., Gombojav A., Demberel S., Miyamoto T.
Cell-wall bound proteinase	peptidase S8 family Peptidases_S8_C5a	PrtH	Lactobacillus helveticus (Lactobacillus suntoryeus)	Q9S4K2 · Q9S4K2_LACHE	MRRNKYAGLLVCATTLSVVSVFSTAEQQVKASVDSQTKTVEKSTKAAESTTANLTNKAVEAQLAAKGVNFKHLTVNQKQDVYVDVIVQLSATPAATNGSVSANSSSAEIEQASKKVIANQASIKEKVKAITNQAIGKSYGYVVNGFATKAKVKDIQKLRNIPGVKSVTLAKVYYANDSSADNMANVSTVWNNYKYKGEGTVVSIIDTGIDPNHKDLRLSDDSKVKLTKDKVNAFTKESGYGRYFTDKVPYGHNYSDNNDNITDDNPSEQHGMHVAGIVAANGTADSVNSVVGVAPEAQLLAMKAFSNSDSSASTDSTSIIGAIDDSAKLGADVLNMSLGSVSGEQTEDDPEVAAVERATKKGTAAVISAGNSGTSNSEIEGVNKAYYGNPDMETLGNPG…	1849	AAD50643.1	Genetic characterization of a cell envelope-associated proteinase from Lactobacillus helveticus CNRZ32. di Pederson J.A., Mileski G.J., Weimer B.C., Steele J.L.
Cell-wall bound proteinase	peptidase S8 family Peptidases_S8_C5a	PrtH	Lactobacillus helveticus (Lactobacillus suntoryeus)	A0A386RFC2 · A0A386RFC2_LACHE	MRRNKYAGLLVCAATLSVVSVFSTAEQQVKASVDSQTKTVEKSTKAAESTTANLTNKAVEAQLAAKGVNLKHLTANQKQDVYVDVIVQLSATPAATNGSVSANSSSAEIEQASKKVIANQASIKEKVKAITNQAIGKSYGYVVNGFATKAKVKDIQKLRNIPGVKSVTLAKVYYANDSSADNMANVSTVWNNYKYKGEGTVVSIIDTGIDPNHKDLRLSDDSKVKLTKDKVNAFTKESGYGRYFTDKVPYGHNYSDNNDNITDDNPSEQHGMHVAGIVAANGTADSVNSVVGVAPEAQLLAMKAFSNSDSSASTDSTSIIGAIDDSAKLGADVLNMSLGSVSGEQTEDDPEVAAVERATKKGTAAVISAGNSGTSNSETEGVNKAYYGNPDMETLGSPG…	1839	AYE61810.1	Complete genomic sequencing of Lactobacillus helveticus LH99 and comparative genome analysis. di Li N., You C., Liu Z.
Cell-wall bound proteinase	peptidase S8 family Peptidases_S8_C5a	PrtH	Lactobacillus helveticus (Lactobacillus suntoryeus)	B5TMF0 · B5TMF0_LACHE	LSNNGNSASVDIQVRLTDLDDYEPGGERGNYLPFSSSTVANPGAAKGAISVLLQKIAGLGKDSDMASFSSWGPLPDYTLKPDISAPGVDVISTANDNGYTTMSGTSMAGPFVAGAATLVKQRLLKTNPELKGAALVEAVKALLMNTAVPQTQKGFDTPVSPRRQGSGQIDVGAATKSPVYITADDGTGSLSLRQIKDGSEFALTFHNLSNQVQA	214	ACH78252.1
Cell-wall bound proteinase	peptidase S8 family Peptidases_S8_C5a	PrtB	Lactobacillus delbrueckii subsp. lactis	A0A0P1DJF5 · A0A0P1DJF5_LACDL	MKGLLIKIFICLKELRKQMQKKKSARHLNKVAELAAALLLSASPLAGTFQSATFVQATSQETVSPRSASRAALTKYLQQEQRYNAKKSYSKFQEAAKEQRQASGQAVSKKNESSVRVIVSLNKSAAFDHTSKPTGSAASVKKIEQASDQVKDGQEKVIKQVEEITGNKVRRQFGYLVNAFSIDMDLDDIDKVKDMPQVKNVTPVKVYHPTDESADQMAQVQDVWQEQKLKGEGMVISIIDTGIDSSHQDLKLDSGVSTALSKSEVESDKSKLGHGKYYTEKVPYGYNYADKNDQIVDNGSGEMHGQHVAGIAGANGQVKGVAPDAQLLAMKVFSNNAKNSGAYDDDIISAIEDSVKLGANVINMSLGSVSSDVDPSDPEQQAVAKASEAGVINVISAGN…	1956	CTQ87265.1	Cloning and Expression of Proteinases of Lactobacilli for Release of Bioactive Peptides from Milk Protein. di Li B., Kliche T., Heller K.J.
Cell-wall bound proteinase	peptidase S8 family Peptidases_S8_C5a	PrtB	Lactobacillus delbrueckii subsp. bulgaricus	Q48545 · Q48545_LACDE	MQKKKSARHLNKVAELAAALLLSASPLAGTFQSAAFVQAASQETVSPRSASRAALTKYLQQEQRYNAKKSYSKFQEAAKEQRQASGQAVSKKNESSVRVIVSLNKSAAFDHTSKPTGSAASVKKIEQASDQVKDGQEKVIKQVEEITGNKVRRQFGYLVNAFSIDMDLDDIDKVKDLPQVKNVTPVKVYHPTDESADQMAQVQDVWQEQKLKGEGMVISIIDTGIDSSHQDLKLDSGVSTALSKSEVESDKSKLGHGKYYTEKVPYGYNYADKNDQIVDNGCGEMHGQHVAGIAGANGQVKGVAPDAQLLAMKVFSNNAKNSGAYDDDIISAIEDSVKLGADVINMSLGSVSSDVGPSDPQQQAVAKASEAGVINVISAGNSGVAGSTADGNPVNNTGT…	1946	AAC41529.1	A new cell surface proteinase: sequencing and analysis of the prtB gene from Lactobacillus delbruekii subsp. bulgaricus. di Gilbert C., Atlan D., Blanc B., Portailer R., Germond J.E., Lapierre L., Mollet B.
Cell-wall bound proteinase	peptidase S8 family Peptidases_S8_C5a	PrtB	Lactobacillus delbrueckii subsp. lactis	Q8GIZ7 · Q8GIZ7_LACDL	MKGLLIKIFICLKELRKQMQKKKSARHLNKVAELAAALLLSASPLAGTFQSATFVQAASQETVSPRSASRAALTKYLQQEQRYNAKKSYSKFQEAAKEQRQASGQAVSKKNESSVRVIVSLNKSAAFDHTSKPTGSAASVKKIEQASDQVKDGQEKVIKQVEEITGNKVRRQFGYLVNAFSIDMDLDDIDKVKDLPQVKNVTPVKVYHPTDESADQMAQVQDVWQEQKLKGEGMVISIIDTGIDSSHQDLKLDSGVSTALSKSEVESDKSKLGHGKYYTEKVPYGYNYADKNDQIVDNGSGEMHGQHVAGIAGANGQVKGVAPDAQLLAMKVFSNNAKNSGAYDDDIISAIEDSVKLGANVINMSLGSVSSDVDPSDPQQQAVAKASEAGVINVISAGN…	1942	CAD55600.1	Complete sequence of prtB gene from Lactobacillus delbrueckii subsp. lactis. di Casey M.G., Haueter M., Gruskovnjak J., Chavagnat F.
Cell-wall bound proteinase	peptidase S8 family Peptidases_S8_C5a	PrtB	Lactobacillus delbrueckii subsp. delbrueckii	A0AAU9R0R4 · A0AAU9R0R4_9LACO	MQKKKSARHLNKVAELAAALLLSASPLAGTFQSAAFVQAASQETVSPRSASRVALTKYLQQEQRYNAKESYSKFQEAAKEQRQASGQAVSKKNEFSVRVIVSLNKSAAFDHTSKPTGSAASVKKIEQASDQVKDGQEKVIKQVEEITGNKVRRQFGYLVNAFSIDMDLDDIDKVKDLPQVKNVTPVKVYHPTDESADQMAQVQDVWQEQKLKGEGMVISIIDTGIDPSHQDLKLDSGVSGVSTALSKSEVESDKSKLGHGKYYTEKVPYGYNYADKNDQIVDNGSGEMHGQHVAGIAGANGQVKGVAPDAQLLAMKVFSNNAKNSGAYDDDIISAIEDSVKLGADVINMSLGSVSSDVDPSDPQQQAVAKASEAGVINVISAGNSGVAGSTGDGNPVNN…	1927	CAH1706100.1
Cell-wall bound proteinase	peptidase S8 family Peptidases_S8_C5a	PrtB	Lactobacillus delbrueckii subsp. lactis	Q7WUL5 · Q7WUL5_LACDL	MQKKKSARHLNKVAELAAALLLSASPLAGTFQSAAFVQAASQETVSPRSASRAALTKYLQQEQRYNAKESYSKFQEAAKEQRQASGQAVSKKNESSVRVIVSLNKSAAFDHTSKPTGSAASVKKIEQASDQVKDGQEKVIKQVEEITGNKVRRQFRYLVNAFSFDMDLDDIDKDKDLPQVKNVTPVKVYHPTDESAEQMAQVQDVWQEQKLKGEGMVISIIDTGIDSSHQDLKLDSGVSTALSKSEVESDKSKLGHGKYSTEKVPYGYNYADKNDQIVDNGSGEMHGQHVAGIAGANGQVKGVAPDAQLLAMKVFSNNAKNSGAYDDDIISAIEDSVKLGANVINMSLGSVSSDVDPSDPQQQAVAKASEAGVINVISAGNSGVAGSTADGNPVNNTGT…	813	AAQ01783.1	Nucleotide sequence and characterization of the cell envelope proteinase from Lactobacillus delbrueckii subsp. lactis CRL 581. di Hebert E.M., Raya R.R., de Giori G.S.
Proteinase	PrsA family Foldase_PrsA	PrtM	Lacticaseibacillus paracasei (Lactobacillus paracasei)	Q02473 · PRSA_LACPA	MKKKMRLKVLLASTATALLLLSGCQSNQADQKVATYSGGKVTESNFYKELKQSPTTKTMLANMLIYRALNHAYGKSVSTKTVNDAYDSYKQQYGENFDAFLSQNGFSRSSFKESLRTNFLSEVALKKLKKVSESQLKAVWKTYQPKVTVQHILTSDEDTAKQVISDLAAGKDFATLAKTDSIDTATKDNGGKISFESNNKTLDATFKDAAYKLKNGDYTQTPVKVTNGYEVIKMINHPAKGTFTSSKKALTASVYAKWSRDSSIMQRVISQVLKNQHVTIKDKDLADALDSYKKPATTN	299	AAA25247.1	Cloning, sequencing and expression of the gene encoding the cell-envelope- associated proteinase from Lactobacillus paracasei subsp. paracasei NCDO 151 di Holck A., Naes H.
Proteinase	PrsA family Foldase_PrsA	PrtM	Lactobacillus helveticus CNRZ32	A4UAD9 · A4UAD9_LACHE	MNKLLKPLMMTVTGFSLLSLAGCSTSNNAEVAQYGKNKKVTQEEFYKELKSSPSSKTVLANLLVYDALKAKYGKKLDIKKVDNEYESYKERYGSQFNNFLVQGGYTRASFKRMIQINFLSRIALESQIKPTDKQLKAAWKDYQPSITVQHILTTSKATAEQVIEQLNDGKSFSSLAKKYSVDSSTSNNGGKLAAFNQENKSLDSTFKNAAYKLEDGEYTKTPVKVTDGYEVIKMVKHPDKGNFESNRAELTKELYNKWAANSTVMRNVISQVLKDQKVKITDKELKSALDEYKGSTTSAVN	301	ABI13575.1	Comparative high-density microarray analysis of gene expression during growth of Lactobacillus helveticus in milk versus rich culture medium. di Smeianov V.V., Wechter P., Broadbent J.R., Hughes J.E., Rodriguez B.T., Christensen T.K., Ardo Y., Steele J.L.
Proteinase	PrsA family Foldase_PrsA	PrtM	Lactobacillus helveticus (Lactobacillus suntoryeus)	V5Z0W9 · V5Z0W9_LACHE	MNQPVKVFLTSSAFLLAFSLTGCSKSNNTEVAQYGKNKKVTQEEFYKAIKTSPSSKTILANLLIYDALNEQYGKKLSSKAVNQEYNNYKERYGDQFASFLSQNGYTTTSFRRMIKINLLSKIALKAQIKPTDKQLKKEWKTYSPSVTVQHILTTDKNTANTVIQKLNNGTSFASLAQKYSVDSSSSSNGGKIAAFNKDNKQLDSSFKDTAYKLKNGEYTTTPVKTTNGYEIIKMIKHPAKGNFEENKQDLINNLYDKWAANSTVMNNVISQTLKDQKVQIKDKDLESTLDQYKGSTKSAIN	301	BAO23452.1	Lactobacillus helveticus isolated from the traditional fermented milk "airag" in Mongolia are generally and phenotypically indigenous. di Miyamoto M., Seto Y., Nakajima H., Brenjargal S., Gombojav A., Demberel S., Miyamoto T.
Proteinase	PrsA family Foldase_PrsA	PrtM	Lactobacillus helveticus (Lactobacillus suntoryeus)	A0A8H9F7X4 · A0A8H9F7X4_LACHE	MKSYMKKVAAVVAVAGVALSTAACSNSGNNATVASYKGGKITQQQYYDEMKKSQAGKSALANMIINRALEQQYGKYVSSKKVDKQYNNYKKQYGSQFSAVLQQNGMTASTFKQNLKTNLLSEAALKHIKKISKKQEQQAWKNYQPKVTVQHILVAKKSTAESIIKQLKDGKSFKSLAKKYSLDTATKNKAGKLPAFDSTDNTLDSAFKTAAFKLKTGEVTESPVKSQSGYHVIKMISHPAKGKFADHKKAIDDEIYASMAQDQAVMKDVIATVLKKADVSIKDNDLKDVLSAYVSTGATK	300	GFO99203.1	Draft genome sequence of Lactobacillus helveticus strain H-8. di Endo A., Maeno S., Kido Y.
Proteinase	PrsA family Foldase_PrsA	PrtM	Lactobacillus delbrueckii subsp. bulgaricus (strain ATCC 11842 / DSM 20081 / BCRC 10696 / JCM 1002 / NBRC 13953 / NCIMB 11778 / NCTC 12712 / WDCM 00102 / Lb 14)	Q1G989 · Q1G989_LACDA	MKNHLKKIAVLAGAAAIGLSTAACSSSSATVVNYKGGKITQDEYYEAMKDTSAGQSTLVSLIIYRTLKAQYGDKVSSKKINAEYNKYKKQYGSSFSTVLSSSGLTTKSFKQNLATNLYLVAALKDLEKPTTTQEKNWWKSYHTKTTVQHIVVAKKSTAETVIKKLKSGTSFATLAKKYSTETATKKKAGKMAAFDSTDTSLSSTFKSAVWKLKEGEYTTTPVKTLSGYEVIKVLKTTEKGSYTKNKSFIDKQLYAKWAADSNTMTKIISKVLKKANVNIKDKDLKSKNLLANYLGTSSSSSSN	303	CAI98333.1	The complete genome sequence of Lactobacillus bulgaricus reveals extensive and ongoing reductive evolution. di van de Guchte M., Penaud S., Grimaldi C., Barbe V., Bryson K., Nicolas P., Robert C., Oztas S., Mangenot S., Maguin E.
Endopeptidase	peptidase C1 family Peptidase_C1B	PepE/PepG	Lactobacillus delbrueckii subsp. lactis	P94869 · PEPG_LACDL	MSHELTLQELAEFSANFNADPKNQVIARAAARSGVLEASYNERVAGRLTRVFSTELPTDNVTNQKQSGRCWLFSTLNVLRHDFGAKHKAKNFTLSQSYNFFWDKLERANLFYEKVIETADKPLDDREVRSYFDFAGHDGGQWHMAISLVKKYGVVPSYVMPESFNTSATNGLASALADKERKDALALRRLAQAGDQEGLEKARKTFLNEIYRMVAIAVGEPPKTFDLEYRDDDKNYHLEKNLTPVSFFNKYFDVDLDDYVVLTNAPDHEYGKLYHLGAEDNVEGGSPILFLNVPMEYLEQTAVAQLKDGEAVWFGNDVLRQMDRKTGYLDTDLYKLEDLFDVDLSLSKADRLATGAGEVSHAMTLVGVDEDKGDIRQWKVENSWGDKSGEKGFFVMSHN…	437	CAA96465.1	Protein founded in Klein Lactobacillus delbrueckii subsp. lactis DSM7290 pepG gene encodes a novel cysteine aminopeptidase
Endopeptidase	peptidase C1 family Peptidase_C1B	PepE/PepG	Lactobacillus helveticus (Lactobacillus suntoryeus)	P94870 · PEPE_LACHE	MAHELTVQELEKFSADFNKNPKNKVVARAAQRSGVLEASYNDRVQSELTRVFSTELDTDNVTNQKHSGRCWLFATLNVLRHEFGKKYKAKDFTFSQAYNFFWDKIERANMFYNRILDSADMPLDSRQVKTDLDFAGTDGGQFQMAAALVEKYGVVPSYAMPETFNTNDTTGFATALGDKLKKDALVLRKLKQEGKDDEIKKTREKFLSEVYQMTAIAVGEPPKKFDLEYRDDDKKYHLEKDLTPLEFLHKYLGGVDFDDYVVLTNAPDHEYDKLYGLPAEDNVSGSIRIKLLNVPMEYLTAASIAQLKDGEAVWFGNDVLRQMDRKTGYLDTNLYKLDDLFGVDLKMSKADRLKTGVGEVSHAMTLVGVDEDNGEVRQWKVENSWGDKSGAKGYYVMNN…	438	AAB52540.1	Protein founded in Fenster Characterization of a thiol-dependent endopeptidase from Lactobacillus helveticus CNRZ32
Endopeptidase	peptidase C1 family Peptidase_C1B	PepE/PepG	Lactobacillus helveticus (Lactobacillus suntoryeus)	A0A3Q8SP93 · A0A3Q8SP93_LACHE	MTAISEQELAGFSADFNSNEKNKVASRAARRSGLYEASFNDRVSERLNHVFSTELDVGGVTDQKHSGRCWEFATLNVLRHYFGKKNKVKDFTFSQAYNFFWDKIERANAFYNAMIKLADKPINDREVQSWLEFAGQDGGLWSMAINLVKKYGVVPSYAMPESFNSNNTTALIDSLARKERKDALLLRKLVNEGKQDELEAAKKKCLGEVYRMVAVALGEPPKKFDLEYRDDDKKYHLEKDLTPQAFVQKYFKDFKFDDYVVLSNCPNHAFNKLYHMPLYDNVEGGDQIKFLNVPIEYLANAAVAQLKAGDAVIFGNDVLKQMERKTGYLDTELYKTDELFGVDTKMSKADRLNTGEGFATHDMTLVGVDEDHGHIRKWKVENSWGDKFGHKGFYEMSQT…	437	AZK90864.1	Protein founded in Kim Complete genome sequence of Lactobacillus helveticus
Endopeptidase	peptidase C1 family Peptidase_C1B	PepE/PepG	Lactobacillus helveticus (Lactobacillus suntoryeus)	A0A8H9KG62 · A0A8H9KG62_LACHE	MKHELTMAEIAKFQQEYEKEPQNRVAELAVVNNGVQKASFNNEGVRKLNRTFSIEIPTDNVTDQKQSGRCWLFAALNTLRHGFAKKYNAKNFTFSQNYLFFWDRVERANIFFDNILNTADRPLDDRTVHTYMQGPDTDGGQWAMAISLIRKYGLVPTYAQDESFTANNTSAFNSALNMKLREDGLILRKLTKENKTDEIETKRQEFLSEVYRMAVIAFGEPVQKFDLEFKDDDGKYHFDGDLTPLDFFHNYFTDDLDDYIVLFNAPDHEFDKLYALPFEDNVEGGTPVQFLNTEIDNLKEAAIKQLEAGETIWFGCDVGKDSDRQKGILSKGLYQTDTIFNIETKLSKKERLQTGASGSTHAMTLVGVDVVDGKPRQWKIENSWGAKVGEKGYFVMDDD…	437	GFO98870.1	Protein founded in Endo Draft genome sequence of Lactobacillus helveticus strain H-8
Endopeptidase	peptidase M3B family Oligoendopeptidase f	PepF	Lacticaseibacillus casei DSM 20011 = JCM 1134 = ATCC 393	A0AAD1APT5 · A0AAD1APT5_LACCA	MSETELPKRQAVDPKLTWDLTPIFHDDFAYDEAVKQVRALTKDFVRMYQGKLTEPAVIVDALADYGTIVALDSKIAHWGFMPYSTDTTDPKLRERQAQVTALGGEIGGQLSFFQAELTQLSETVLDAVVEKAPDYAGFIRQIKVAKKGALPPAAEKVLAELSPVFQAPSNIRDQTIFGDMDFGTFTAHGKTYPLSFVMYEENYQKHPDTEIRRAAYAQFNKTLRRYENTMAAGYLAQVTREKITATMRGYDSVIDYLLADQEINREMFNRQIDVIMHDLAPVMRKYVTHVKTLWGLDHIGYTDLQIDIDPSYAPTITLAQAQEMIKNATALMGKDYQDQMMQAFSDHWIDFPANQGKDSGAYTAGPYGVHPYVEMTWSNTLPAVYTLIHELGHTAQMVR…	604	BAN73697.1	Protein founded in Toh Genomic adaptation of the Lactobacillus casei group
Endopeptidase	peptidase M3B family Oligoendopeptidase f	PepF	Lacticaseibacillus casei DSM 20011 = JCM 1134 = ATCC 395	A0AAD1APB0 · A0AAD1APB0_LACCA	MQHLPVREDVPTKLTWDLTTIYPNDAAWTADFGAVREQAKEATALKGTLGNSAAALINGIKAVLAVFRRFEKVYVYSSLKSDQDTGNATYQAMNAKAESLGAELASQLAFLDPEILAIPADKLAAWRDTESLKPFGHFIDAITVNRQHVLTAAAEALIASAGNALNASHATFNVLDNSDLQFGFVENEDGETVQLSNGLYGQLIRSTQRKLRKEAFETLLRAYESMKNTFAQTLSGQVKAHNFNAKAHHYANARAAAMASNHIPESVYTTLIDQVNTHLPLLHRYVALRKKVLGVDQLHMYDIYTPLTGKPPLTFTLDQAKAEALKALAPLGDDYLSHVREIFDNRYIDVVENKGKRSGAYSGGSYDTNPFILLNWHDAVDELYTLIHETGHSVHSWYT…	599	BAN73352.1	Protein founded in Toh Genomic adaptation of the Lactobacillus casei group
Endopeptidase	peptidase M3B family Oligoendopeptidase f	PepF	Lacticaseibacillus chiayiensis	A0A4Q1TX95 · A0A4Q1TX95_9LACO	MSETELPKRQAVDPKLTWDLTPIFHDDFAYAEAIKQVRALTKDFVRMYQGKLTEPAIIVDALADYGTIVALDSKIAHWGFMPYSTDTTDPKLRERQAQVTALGGEIGGQLSFFQAELTQLSETVLDAVVEKAPDYAGFIRQIKVAKKGALPPVAEKVLAELSPVFQAPSNIRDQTIFGDMDFGTFTAHGKTYPLSFVMYEENYQKHPDTEIRRAAYAQFNKTLRRYENTMATGYLAQVTREKITATMRGYDSVIDYLLADQEINREMFNRQIDVIMRDLAPIMRKYVIHVKTLWRLDHIGYTDLQIDIDPSYAPKITLDQAQDMIKNATALMGKDYQDQMIQAFTDRWIDFPANQGKDSGAYTAGPYGVHPYVEMTWSNTLPAVYTLIHELGHTAQMVR…	604	RXT23526.1	Protein founded in Huang Lactobacillus chiayiensis sp. nov., a lactic acid bacterium isolated from compost
Endopeptidase	peptidase M3B family Oligoendopeptidase f	PepF	Lacticaseibacillus chiayiensis	A0A4Q1TUU4 · A0A4Q1TUU4_9LACO	MQHLPVREDVPTKLTWDLTTIYPNDAAWVADFEAVREQAKEAAMLKGTLGNSADALINGIKAVLSVFRRFEKVYVYSSLKSDQDTGNATYQAMNAKAESLGAELASQLAFLDPEILAIPADKLTAWRDTESLKPFGHFIDAITVNRQHVLTTAAEALIASAGDALNASHATFNVLDNSDLQFGFVENEDGETVQLSNGLYGQLIRSTQRKLRKEAFETLLRAYESMKNTFAQTLSGQVKAHNFNAKVHHYATARAAAMASNHIPESVYTTLIDQVNTHLPLLHRYVALRKKILGVDQLHMYDIYTPLTGKPPLTFTLDQAKVEALKALAPLGDDYLSHVREIFDNRYIDVVENKGKRSGAYSGGSYDTNPFILLNWHDAVDELYTLIHETGHSVHSWYT…	599	RXT22699.1	Protein founded in Huang Lactobacillus chiayiensis sp. nov., a lactic acid bacterium isolated from compost
Endopeptidase	peptidase M3B family Oligoendopeptidase f	PepF	Lacticaseibacillus paracasei (Lactobacillus paracasei)	A0AAX3CG96 · A0AAX3CG96_LACPA	MSETALPKRQEVDPKLTWDLTPIFADEFAYTEAIKQVRALTKDFVHLYQGKLTEPAIIVDALGDYGSIIELDSKIGHWAFMPYSTDTTDPKLRDRQIKATALDGEIGGQLSFFQAELTQLPEEVLDAVVAKAPDYAGFFRQIKIAKKGALAPAAEKVLAELSPVFQAPSNIRDQTIFGDMDFGTFTAHGKTYPLSFVMYEENYQKHPDTEVRRAAYAKFNQTLRRYQNTMAAGYLAQVTREKITATMRGYDSVIDYLLADQEVSRAMFDRQIDVIMHDLAPIMRKYITHVKGLWGLDHIGYTDLQIDIDPAYSPTITLDQAKQDIEKATAIMGHDYQAQMMQAFTDHWIDFPANQGKDSGAYTAGPYGVHPYVEMTWSNSLPAVYTLIHELGHTAQMVR…	603	UWY25311.1	Protein founded in Colautti Draft genome sequences of 14 Lacticaseibacilli, representatives of a collection of 200 strains
Endopeptidase	peptidase M3B family Oligoendopeptidase f	PepF	Lacticaseibacillus paracasei (Lactobacillus paracasei)	A0AAX3CDU2 · A0AAX3CDU2_LACPA	MQHLPARAEVPTELTWDLTTIYPDDKAWQVDFEAVRQQAKEAAALKGTLGKSPEALVAGIKAVLAVFRRFEKVYVYSSLKSDQDTGNAAYQAMNAKAESLAADLASQLAFMDPEILAIPADQLTAWRDTESLKPYGHFIDAITVNRQHVLTTAAESLIASAGDALNASHATFNVLNNSDLQFGFVENEDGETVQLSNGLYGQLIRSTNRKLRKDAFEALLRAYESLKNTFAQTLSGQIKAHNFNALAHHYPDARAAAMASNHIPESVYTTLLDQVNAHLPLLHRYIALRKKILNVDQLHMYDIYTPLTGRPPFSFTLDQAKDEALKALAPLGNDYLDHMREIFNNRYIDVVENKGKRSGAYSGGAYDTNPFILLNWHDAVDELYTLVHETGHSVHSWYT…	599	UWY24830.1	Protein founded in Kim Newly isolated Lactobacillus paracasei strain modulates lung immunity and improves ability to cope with influenza virus infection
Endopeptidase	peptidase M3B family Oligoendopeptidase f	PepF	Lacticaseibacillus rhamnosus (strain ATCC 53103 / LMG 18243 / GG) (Lactobacillus rhamnosus)	A0A809N3Y5 · A0A809N3Y5_LACRG	MSETTLPKRQAVDQQLTWDLTPIFSDDFAYTEAVKQVRALTKDFVRMYQGKLTQPAVIADALADYGTIVALASRIIHWGFMPYSTDTTDPALRTRQAQVTGLDGEISGQLSFFRAELTQLPENVLDAVVETAPDYAGFIRQIKVAKQGALPPAAEKVLAELTPVFQAPSDIRDQSIFGDMDFGTFTAHGKTYPLSFVMYEENYQKHPDTEIRRAAYAQFNQTLRRYENTMAAGYLAQVTREKITATMRGYDSVIDYLLADQEITREMFNRQIDVIMNDLAPIMRRYVTLVKSLWGLDHIGYTDLQIDIDPSYAPTITLEQAKEDIKNATALMGQDYQAQMMQAFSERWIDFPANQGKDSGAYTAGPYGVHPYVEMTWSNTLPAVYTLIHELGHTAQMVR…	604	AXI93703.1 o BAI41237.1	Protein founded in Morita Complete genome sequence of the probiotic Lactobacillus rhamnosus ATCC 53103 e Protein founded in Toh Genomic adaptation of the Lactobacillus casei group
Endopeptidase	peptidase M3B family Oligoendopeptidase f	PepF	Lacticaseibacillus rhamnosus (strain ATCC 53103 / LMG 18243 / GG) (Lactobacillus rhamnosus)	A0A809MT22 · A0A809MT22_LACRG	MQHLPAREDVPTQLTWDLTTIYPDDSAWETDFKAVRAQAKAAVALKGTLGNSADALVTGIKAVLAVFRRFEKVYVYSSLKSDQDTGNATYQAMNAKAESLGAELASQLAFLDPEILAIPSDKLTAWRDTESLKPFGHFIDAITVNREHVLTTAAEALIASAGDALNASHATFNVLNNSDLQFGFVENEDGETVQLSNGLYGQLIRSTNRKLRKEAFEALLRAYESLKNTFAQTLSGQVKAHNFNATAHHYKNARAAAMASNHIPESVYTTLIDQVNTHLPLLHRYVALRKKVLAVDQLHMYDIYTPLTGQPPLTYTLEQAKAEALKALAPLGDDYLEHVREIFDNRYIDVVENKGKRSGAYSGGAYDTNPFILLNWHDAVDELYTLVHETGHSVHSWYT…	599	AXI93318.1 o BAI40812.1	Protein founded in Morita Complete genome sequence of the probiotic Lactobacillus rhamnosus ATCC 53103 e Protein founded in Toh Genomic adaptation of the Lactobacillus casei group
Endopeptidase	peptidase M3B family Oligoendopeptidase f	PepF	Lacticaseibacillus zeae (Lactobacillus zeae)	A0A5R8LTU1 · A0A5R8LTU1_LACZE	MSETELPKRQAVDPKLTWDLTPIFHDDFAYDEAVKQVRALTKDFVRMYQGKLTEPAVIVDALADYGTIVALDSKIAHWGFMPYSTDTTDPKLRERQAQVTALGGEIGGQLSFFQAELTQLSETVLDAVVEKAPDYAGFIRQIKVAKKGALPPAAEKVLAELSPIFQAPSNIRDQTIFGDMDFGTFTAHGKTYPLSFVMYEENYQKHPDTEIRRAAYAQFNKTLRRYENTMAAGYLAQVTREKITATMRGYDSVIDYLLADQEINREMFNRQIDVIMHDLAPIMRKYVTHVKTLWGLDHIGYTDPQIDIDPSYAPTITLAQAQEMIKNATALMGKDYQDQMMQAFSDHWIDFPANQGKDSGAYTAGPYGVHPYVEMTWSNTLPAVYTLIHELGHTAQMVR…	604	TLF40646.1	Protein founded in Huang Genome-based reclassification of Lactobacillus casei as Lactobacillus casei subsp. casei. subsp.nov., description of Lactobacillus casei subsp. zeae subsp. nov., and emended description of Lactobacillus casei
Endopeptidase	peptidase M3B family Oligoendopeptidase f	PepF	Lacticaseibacillus zeae (Lactobacillus zeae)	A0A5R8LN74 · A0A5R8LN74_LACZE	MQHLPVREDVPTKLTWDLTTIYPNDAAWTADFEAVREQAKGAAALKGTLGNSADALITGIKAVLAVFRRFEKVYVYSSLKSDQDTGNATYQAMNAKAESLGAELASQLAFLDPEILAIPADKLTAWRDTESLKPFGHFIDAITVNRQHVLTTAAEALIASAGDALNASHATFNVLDNSDLQFGFVENEDGETVQLSNGLYGQLIRSTQRKLRKEAFETLLRAYESMKNTFAQTLSGQVKAHNFNAKAHHYANARAAAMASNHIPESVYTTLIDQVNTHLPLLHRYVTLRKKVLGVDQLHMYDIYTPLTGKPPLTFTLDQAKTEALKALAPLGDDYLSHVREIFDNRYIDVVENKGKRSGAYSGGSYDTNPFILLNWHDAVDELYTLIHETGHSVHSWYT…	599	TLF38678.1	Protein founded in Huang Genome-based reclassification of Lactobacillus casei as Lactobacillus casei subsp. casei. subsp.nov., description of Lactobacillus casei subsp. zeae subsp. nov., and emended description of Lactobacillus casei
Endopeptidase	peptidase M3B family Oligoendopeptidase f	PepF	Lactobacillus delbrueckii subsp. lactis DSM 20072	A0AAC9VPS4 · A0AAC9VPS4_LACDL	MEIPYRSEVPKEQTWDLTRIFKTEADWEAAFKAVKQEVKALPALEDGFTESAAVLYDRLTQIFAVDRRLSKIYVYASMASDVDTSNQKKLALNSRGQSLAAEYQAAVAFIQPAILALGKEGLDAFFKEEPRLENYRHYLEQIVKQEEHVLPAEEEKLVSAAGDALSASANTFNVLTNSDLQFPYIEDEDGEAVELTEANYDILIQSQNREVREDAFDALYAVYGQFASTFASTLAGNVKAHNFDAQTHHYQDALAAALSENNIPVDVYNQLLTSVHKHLDLLHRYVNLREEILDLKGDLQMWDMYVPITGKPSLSYTFAEAKAQAREALQVLGEDYVKHVDYLFNNRCIDHVANMHKQSGAYSGGAYDTDAYELLNWQGDLDSLYTLVHETGHSVHSMY…	600	ASW12532.1	Protein founded in Lee Genome sequencing of Lactobacillus delbrueckii subsp. lactis DSMZ20072T
Endopeptidase	peptidase M3B family Oligoendopeptidase f	PepF	Lactobacillus helveticus CNRZ32	Q6UP04 · Q6UP04_LACHE	MAIPTRSEVPEDLKWDLTRIFKTDQDWENAFDKAKDDVAKLSELKGSLAKSGKDLYEGLTKILAVKRDVENIYVYATMSSDVDTSNSHYLGYVSRVQSLSNQFEATTSFINPEILSIPAEKFEQFKKDEPRLADYAHYLEMITNKRPHTLPAEEEKIIADAGDAMSVSENTFNVLTNSDMEYGYVQDEDGNMEQLSNGLYSLLIQSQNRDVRKGAFNTLYASYGQFQNSLASTLSGVVKKHNYNARMHKYDSAREAALADNGVPVEVYDTLIKEVDSHLDLLHRYVALRKKILGLKDLQMWDMYVPLTGKPALSYNFEEAKKVAKEAMKPLGEDYLKHVDYIFNNRVIDPVESKGKVTGAYSGGAYDTDPYELLNWEDNIDSLYTLVHETGHSVHSWYT…	598	AAQ72430.1	Protein founded in Endo Draft genome sequence of Lactobacillus helveticus strain H-8
Endopeptidase	peptidase M13 family Neutral endopeptidase	PepO	Lactobacillus delbrueckii subsp. delbrueckii	A0AAU9R5L3 · A0AAU9R5L3_9LACO	MNNKFAVRGGSGDTTVVDKTARPQDNLYLAVNSDYLDQLEIPADRSRMGSFDQIAENVEKTLMADFAAFASGEKEVPALPNLAKAVELYKLAKDFDKRNADGAEPIQADLKKLEGLNSWNDLQGAASALAKEGFDLPFSFSVDADMKNTKVNTVYFGGPHIFLPDTTTYESPDAEKLLGVLKEQTLKLFQMAGVSEEKAAEYVDGALAYDQRLAKVVKSSEEWADYPAMYNPISLADFKSKFTSFDMGQFLVGFLGEEPEVLINTEPRYLDQAEGLLNEASFSEIKGWMLVKFINDVASSLSQEFREAAFPFSQALTGQPQLASGIKQAYRIANSTFSEVVGVYYGQTYFGAAAKEDVLGMIKRMLKVYEDRLAKNDWLSQATKDKAITKLQALILKVG…	650	CAH1706912.1
Endopeptidase	peptidase M13 family Neutral endopeptidase	PepO	Lactobacillus helveticus (Lactobacillus suntoryeus)	O52071 · PEPO_LACHE	MRRYLAVRGGAGDVAEPDLNAKPQDNLYLAVNSEWLSKAEIPADQTSAGVNTELDIKIEKRMMKDFADIASGKEKMPDIRDFDKAIALYKIAKNFDKRDAEKANPIQNDLQKILDLINFDKFKDNATELFMGPYALPFVFDVDADMKNTDFNVLHFGGPSTFLPDTTTYKTPEAKKLLDILEKQSINLLEMAGIGKEEARVYVQNALAFDQKLSKVVKSTEEWSDYAAIYNPVSLTEFLAKFKSFDMADFLKTILPEKVERVIVMEPRFLDHADELINPANFDEIKGWMLVKYINSVAKYLSQDFRAAAFPFNQAISGTPELPSQIKQAYRLANGAFDEAVGIFYGKKYFGEEAKHDVEDMIHNMLKVYEQRINDNNWLSEDTKKKAIIKLRALVLKIG…	647	AAC35997.1	Protein founded in Chen Genetic characterization and physiological role of endopeptidase O from Lactobacillus helveticus CNRZ32
Endopeptidase	peptidase M13 family Neutral endopeptidase	PepO	Lactobacillus helveticus (Lactobacillus suntoryeus)	A0A3S8SDQ4 · A0A3S8SDQ4_LACHE	MNNKMTVRGGAGDITEADLSARPQDNLYLAVNSEWLKNAKIPSDRSRTSSFDGIDLNIEKELMQDFADFADGKKDLPDVPNFEKAVALYKIARDFDRRNADGADPIQADLHEILGLRNFADFTLKAADFFKNGFPMPFDFSVEADMKNTKIHSLQFGGPGTFLPDTTTYKTPAAEKLLAVLKEQSINLLTMSGISKSEAEDYAEKALAYDAKIAKVVKSAEEWADYPATYNPISRDDFADKFKSFKMDYFLGELFAKKPERVINTEPRYLDHAEELLNEDVFAEIKAWMLVKFINGVASSLSQEFREAAFPFSQALSGQPELPSGVKQAYRIANSDFSEVVGVYYGQTYFGAEAKADVTDMIHKMLDVYEKRIRENSWLSQATKDKAIVKLRSLILKIG…	647	AZK91921.1	Protein founded in Kim Complete genome sequence of Lactobacillus helveticus
Endopeptidase	peptidase M13 family Neutral endopeptidase	PepO	Lactobacillus helveticus (Lactobacillus suntoryeus)	A0A3Q8STS3 · A0A3Q8STS3_LACHE	MNLAKIRGGAGDITKPDLNARIQDNLYLAVNSDWISKAKIPADRPLISSFSEIDLKIEKELMNDLADFASGKKALPDIPNFDKAIEVYKLAKDFAKRDADGFQPAQADLETLINLKDVDDVKQNLAKLFLRFSFPFLFEVEPDRKNTKTNSLSFDRNSLILPDTTSYQSPAAKQLLDVWQKQTENLLKMAGVEEAAAKKYATDAIALDAKIVKVAKSAEERADDVALYNPIKTNEFEEKTSSLNLGQLLEQLFEKKPNYVVVREPKFLDHFNELFNQESFDELKGWLISTFINKAAAFLSEEFRQAAFPFKQATYGQKELPSQEKEAYYKANNLFDDVIGVYYGRTYFGEDAKADVEDMIHRMIDVYEQRITNNEWLSPATKEKAITKLHALVLKIGYP…	648	AZK90655.1	Protein founded in Kim Complete genome sequence of Lactobacillus helveticus
Endopeptidase	peptidase M13 family Neutral endopeptidase	PepO	Lactobacillus helveticus (Lactobacillus suntoryeus)	Q076V0 · Q076V0_LACHE	MTVRGGAGDITEADLSARPQDNLYLAVNSEWLKNAKIPSDRSRTSSFDGIDLNIEKELMQDFADFADGKKDLPDVPNFEKAVALYKIAKDFDRRNADGADPIQADLHEILGLRNFADFTFKAADFFKNGFPMPFDFSVEADMKNTKIHSLQFGGPGTFLPDTTTYKTPAAEKLLAVLKEQSINLLTMSGISKSEAEDYAEKALAYDAKIAKVVKSAEEWADYPATYNPISRDDFADKFKSFKMDYFLGELFAKKPERVINTEPRYLDYAEELLNEDVFAEIKAWMLVKFVNGVASSLSQEFREAAFPFSQALSGQPELPSGVKQAYHIANSDFSEVVGVYYGQTYFGAEAKADVTDMIHKMLDVYEKRIRENSWLSQATKDKAIVKLRALILKIGYPDK…	643	ABB30009.1	Protein founded in Soeryapranata Cloning and characterization of debittering peptidases, PepE, PepO, PepO2, PepO3, and PepN, of Lactobacillus helveticus WSU19
Aminopeptidase	peptidase M42 family Zn peptidases	PepA	Lacticaseibacillus rhamnosus (strain LMS2-1)	C2K0F9 · C2K0F9_LACRM	MDLQLMAALSNADAIAANEDEVRAVLRHHLASYGLTSQTDGLGSLIFTKEAADPQFSVMIYGHMDEVGYMVRTITPEGLLRLMVVGGVKPAASHWQNVRITTAAGHKLPGMVIRDDTLPAFDQVLCDVGANSADDVAALGIAIGDMVTFATEFHGYAPDGVFGGKALDDRLGCYVGAQLLAELADEKLPFTLHFAATSSEEVGIRGAKTATQLIKPDLAFIVDVATFQNPRERSEVNQRQVGKGPILTHFDRTLAPNRHLQQFVKATAVAAEIPLQLDMFNGGGTDGGEAHKVGSGIPTVVTILPCRYGHCAQSLAHTRDVDQMVALYAAMCRQLSAKLVAAAHTF	346	EEN79241.1
Aminopeptidase	peptidase M42 family Zn peptidases	PepA	Lactobacillus delbrueckii subsp. delbrueckii	A0AAU9R2B0 · A0AAU9R2B0_9LACO	MEKAAEIQMLKDFSNANATSGFENEFVDLFTKTVKDYADLEVDGMLNVYASKKQNTGKRPVIQLDAHSDAVGFLTQAIRPNGLIKFVTLGGWNNVVLPALKVKVRNRDGEYIPGVVALKPPHFMSEAERKSVPQVADLSIDVGSSSREETINDYKIDTGCPIFVDVDCEYNEKTGLFFGKDFDDRFGAAAMADILENLKDEEVNFDLVAALSSQEEVGLRGAYVTARKIKPDLCLVLESCPADDTFEPDWLSQTGLKRGPMLRDMDVTFLPNPKFQQYACDLADKNGIPYTRSVRTGGGQDGAAIYYENGAPTIVIGIPVRYEHSPYCFSSYKDYKAAVDLALAIIRDIDKEKLESFKSFN	361	CAH1706663.1
Aminopeptidase	peptidase C1 family Peptidase_C1B	PepC	Lacticaseibacillus rhamnosus (strain LMS2-1)	C2JYY2 · C2JYY2_LACRM	MIFITSRMVTQLMHIKRSVYLMSAEITSGDLDQFKQDLQATPGANALQKAVMNNGINATAENTDSKVAMTPTFSIELDTGAVSNQKQSGRCWMFAALNTMRHGIQAQFKIKDFELSQNYTFFWDKFEKSNYFYENVLKTADQPLDSRKVAFLLATPQQDGGQWDMLSALIEKYGIVPKSVMPETYSSSKSNELNGLLNLKLRKDAVTLRKLVADKASDADIEAAKQKMLAEDYRILAYTLGNPPTKFDFEYRDDDKNYHIDRELTPQTFFKKYVGWNLDDYQSIINAPTADKPYKHLYTVEMLGNVVGGREVRHLNLDIDTFKDLAIKQLKAGESVWFGSDVGQSSDRQLGILDTNIYKKDDLFNTDFTMTKAERLDYGESLMTHAMVLTGVDLVDGKP…	469	EEN79815.1
Aminopeptidase	peptidase C1 family Peptidase_C1B	PepC	Lacticaseibacillus rhamnosus (strain LMS2-1)	C2JYY3 · C2JYY3_LACRM	MQFEKEDVMSEITFDQIKAFQDQLDQHPASGALGRAVQNVGPQAASRETMDGEDMKPVFSIDLDTGSVANQKKSGRCWLFATLNTVRHGIADEFGIKDFEFSQNYNAFFDRLEKANLFYENILATADKPLDDREVATYLSGPDEDGGHYDQAAALIEKYGLVPKSVMPETYNSDKTAELNSVLNEKLRKDAKVLRTLKQDNASEEAIAKQKREFLSVVYRILAYTFGNPPTTFDFEYRDDKKQYHRDTNLTPQSFFKKYVKWHFDDYVVIAGDPEPTKKYQQLYTINSANTVVEGHPLTILNLPPERLKQLALAQLQAGEAVWFGNDVLADMDRKSGTLKGGLFNYSDLFGVDFHVNKTDRIVTTEAEMSHAMTLTGADVVDGTVTKWKVENSWGKENG…	447	EEN79816.1
Aminopeptidase	peptidase C1 family Peptidase_C1B	PepC	Lactobacillus delbrueckii subsp. lactis	Q48543 · PEPC_LACDL	MSKEISFDTIEDFTSNLSKHPAYGVAANAAQTNGIFKASQSTQSKVDLDPTFSVEIDTGSVTNQKQSGRCWMFSALNTMRHSIQKEFKLKGFELSQSYTFFWDKFEKSNFFFENVIGSADKPLGDRKVSFLFATPQSDGGQWDMLCGLIEKYGIVPKKVYPETANSENSRALNDTLNTMLRKGGLELRALVNEGKSTEEVEAHKAELLDAIFRMLATSLGLPPKSFNFEYTDDDGNYHIDKDITPQDFFKKYVGWDLENYISVINGPTADKPYNKVFSVEYLGNVVGGRQVRHLNLELSKFKELIINQLKQGEVVWFGSDVSKGGDREAGLLDTKIYQRDQLFDYDFSMSKADRLDSGESMMNHAMVITAVDLVDDKPTKWKIENSWGDKSGFKGYFVM…	449	CAA56689.1	Protein founded in Klein Cloning and nucleotide sequence analysis of the Lactobacillus delbrueckii ssp. lactis DSM7290 cysteine aminopeptidase gene pepC
Aminopeptidase	peptidase C1 family Peptidase_C1B	PepC	Lactobacillus helveticus (Lactobacillus suntoryeus)	Q10744 · PEPC_LACHE	MAKEINNDTIAKFENDLNNHPVFNVASHAAQENGIYKASQNLQTKIDLDPIFSIEIDTGKPADQKQSGRCWMFSALNTMRHPLQKKFKLQDFELSQNYTNFWDKFEKSNWFFENVIATADKDLGDRKVSFLFATPQQDGGQWDMLCGIIEKYGIVPKSVYPETANATNSSALNDTLNTLLRKDGLELRRLVNAGKSEDEVQARKEEMLNDVFRVLAISTCVPPKKFNFEYRDDNHNYHIDKDITPKEFFDKYVGMDLANHISTINAPTSDKPFHKVFSVEYLGNVEGGRQVRHLNLKVDEMKDLIIKQLNNGEVVWFGSNVVKDSERRAGLLATNLYRRDQLFDVDFSMSKADKLDSGESMMDHAMVITGVDIVDGKPTKWKIENSWGEKPGFKGYFVM…	449	CAA82997.1 o AAA25250.1	Protein founded in Vesanto Characterization and expression of the Lactobacillus helveticus pepC gene encoding a general aminopeptidase e Protein founded in Fernandez Characterization of the Lactobacillus helveticus CNRZ32 pepC gene
Aminopeptidase	peptidase M24 family Creatinase/methionine aminopeptidase superfamily Creatinase/prolidase N-terminal domain	PepM	Lactobacillus delbrueckii subsp. bulgaricus (strain ATCC 11842 / DSM 20081 / BCRC 10696 / JCM 1002 / NBRC 13953 / NCIMB 11778 / NCTC 12712 / WDCM 00102 / Lb 14)	Q1GB88 · Q1GB88_LACDA	MITIKSVRELKGMQASGHLLATMFEALRDVIKPGISTWDIEEFCQEFVSSRGGRLSEQGFEGYKYGTCISVNDEIAHNIPRKNVFLKEGDLVKVDVTCNLNGYESDSCTTYGVGQISEEDQHLIDVTKKAMYMGIDQAVVGNRIGDIGAVIQHYVEDEEGYGDVRELIGHGIQPSIHEDPEVPHWGKAGHGLRLREGMTITVEPMVEAGGDWRILQKTVDDPNDDWVFYATPDGSKSAQFEHTFAITKDGPKILTLQKPYDGLEKYIPHFDEMED	275	CAI97386.1	Protein founded in van de Guchte The complete genome sequence of Lactobacillus bulgaricus reveals extensive and ongoing reductive evolution
Aminopeptidase	peptidase M24 family Creatinase/methionine aminopeptidase superfamily Creatinase/prolidase N-terminal domain	PepM	Lactobacillus helveticus (Lactobacillus suntoryeus)	Q2VWB0 · Q2VWB0_LACHE	MQASGHLLATMFEGLRDVIKPGISTWEIEEFCQDFVKSRGGRLSEQGFEGYKYGTCISVNDEIAHQTPRKDRILKEGDIVKVDVTCNLNGYESDSCTTYPVGEISEADKKLIEVTKKAMYLGIDQAVLGNRIGDIGAAIQHWVEDENHYGDVRELIGHGIQPSIHEDPEVPHWGKAGHGIRLREGMTITCEPMVEAGGDWHIDQRTVDDPNDDWVYYATPDGSNAAQFEHTFAITKDGPKILTLQKPYDGLEKYIPHFDEMDD	263	AAV80224.1	Protein founded in Callanan Bioinformatic analysis of the peptidase genes of Lactobacillus helveticus DPC4571 and correlation with enzyme activities detected in cell free extracts
Aminopeptidase	peptidase M1 family M1_APN-Q_like	PepN	Lacticaseibacillus rhamnosus (strain LMS2-1)	C2K115 · C2K115_LACRM	MTVATHFYQLFQPEHYNLYLDINRETKKISGKTTITGDAKQTEIAVHQKYLTVSAVQADGKDVPFTVDDPAEAVRITLPQAGKVTLTLTYTAPLTDTMMGIYPSYYEVDGVKKQIIGTQFETTAARQAFPSVDEPEAKATFDLAIKFDEHPGETIISNMPEVREENGVHYFDTTVRMSTYLIAFAFGELQNKQTTTKSGVKIGVFATKAHQPNELDFALDIAKRSIEFYEDFYQTPYPLPHSWQLALPDFSAGAMENWGLVTYREALLTLDPDNTSLETKQRVATVIAHELAHQWFGDLVTMKWWDDLWLNESFANMMEYVAVDALQPDWHIWETFQTLEVPMALQRDATDGVQSVHVQVEDPAEIDSLFDSAIVYAKGARMLVMVRSLIGDDALRAGL…	844	EEN79191.1
Aminopeptidase	peptidase M1 family M1_APN-Q_like	PepN	Lactobacillus delbrueckii subsp. lactis	P37896 · AMPN_LACDL	MAVKRFYETFHPDHYDLYIDVDRAARSFSGTSTIHGEIQEETVLVHQKYMTISKVTVDGKEVPFTFGDDFEGIKIEAGKTGEAVIAIDYSAPLTDTMMGIYPSYYQVDGVKKELIGTQFETTFAREAFPCVDEPEAKATFSLALKFDEHEGETVLANMPEDRVENGVHYFKETVRMSSYLVAFAFGEMRSLTTHTKSGVLIGVYSTQAHTEKELTFSLDIAKRAIEFYEDFYQTPYPLPQSLQLALPDFSAGAMENWGLVTYREAYLLLDPDNTTLEMKKLVATVVTHELAHQWFGDLVTMEWWDNLWLNESFANMMEYLSVDHLEPNWHIWEMFQTSEAAAALTRDATDGVQSVHVEVNDPAEIDALFDGAIVYAKGSRMLVMVRSLLGDEALRKGLK…	843	CAA79805.1	Protein founded in Klein Cloning, DNA sequence analysis and partial characterization of pepN, a lysyl aminopeptidase from Lactobacillus delbruckii ssp. lactis DSM7290
Aminopeptidase	peptidase M1 family M1_APN-Q_like	PepN	Lactobacillus helveticus (Lactobacillus suntoryeus)	Q10730 · AMPN_LACHE	MAVKRFYKTFHPEHYDLRINVNRKNKTINGTSTITGDVFENPVLINQKFMTIDSVKVDGKNVDFDVIEKDEAIKIKTGVTGKAVIEIAYSAPLTDTMMGIYPSYYELEGKKKQIIGTQFETTFARQAFPCVDEPEAKATFSLALKWDEQDGEVALANMPEVEVDKDGYHHFEETVRMSSYLVAFAFGELQSKTTHTKDGVLIGVYATKAHKPKELDFALDIAKRAIEFYEEFYQTKYPLPQSLQLALPDFSAGAMENWGLVTYREAYLLLDPDNTSLEMKKLVATVITHELAHQWFGDLVTMKWWDNLWLNESFANMMEYLSVDGLEPDWHIWEMFQTSEASSALNRDATDGVQPIQMEINDPADIDSVFDSAIVYAKGSRMLVMVRSLLGDDALRKGL…	844	AAA81951.1 o CAA82978.1	Protein founded in Christensen Sequence analysis, distribution and expression of an aminopeptidase N- encoding gene from Lactobacillus helveticus CNRZ32 e Protein founded in Varmanen Characterization and expression of the pepN gene encoding a general aminopeptidase from Lactobacillus helveticus
Aminopeptidase	peptidase M29 family	PepS	Lacticaseibacillus casei DSM 20011 = JCM 1134 = ATCC 393	A0AAD1AQN0 · A0AAD1AQN0_LACCA	MPLANFNEKLKQYADLAVDIGVAVKPGDTVYLQIAVDQAPLARLIVAAAYQRGAAEVQVQWSDDTLKRLDMAHMAEDRLFNIPPFVKGQFDYWVDHQAKRITVISSDPDNLAAIDPTRIANYQEAFTKAYQRLMNAISSMSISWTIIGAASPAWAQKVFPDAKTPQEATDRLWEAIFKTTRIDHPDPEAAWKAHDQKLSAKAKWLTNEQFDQLHYMAPGTDLVVGLPKNHIWKGAGAFNPRGEEFMANMPTEEVFTAPDFRRIDGTVVSTKPLSYSGQILEGMQFTFKNGQVVNAHADRGNDVLQNLLKTPGARSLGEVSLVPDPSPISQSGLIFFNTLYDENASDHMALGQAYPFSVKDGVAMNAEQRRAAGLNQSPTHVDFMMGSASTNIDGIKPDG…	411	BAN74117.1	Protein founded in Toh Genomic adaptation of the Lactobacillus casei group
Dipeptidase	peptidase M29 family	PepS	Lacticaseibacillus paracasei (Lactobacillus paracasei)	A0A422M732 · A0A422M732_LACPA	MTLPNFDKSLKQYAELAVDIGVAVKPGDTVYLQIAVDQAKLAQLIVAAAYDRGAAEVQVQWHDDLIKRLDMAHMATSRLYNIPDFIKGQFDYWVDHNAKRITVISADPDNLAGLDSQRIANYQNAFNQAYARLMDAISSMKISWTIIGAASPKWAEKVFPDAKTPEEATDKLWAAIFKTTRIDQPDPEAAWKAHDQQLRTKADWLNTEQFDRLHYVAPGTDLVVGLPKHHIWEGAGAYNPRGEEFMANMPTEEVFTAPDFRRIDGTVASTKPLSYSGNILEGMHFTFKNGQVVDAHADRGDTVLQNLLKIPGARSLGEVSLVPDPSPISQSGLIFFNTLYDENASDHMALGQAYPFSVKDGVAMTTDQRTAAGLNQSNTHVDFMMGSADMNIDGIKADG…	411	RND83572.1	Protein founded in Wuthrich Conversion of Methionine to Cysteine in <i>Lactobacillus paracasei</i> Depends on the Highly Mobile <i>cysK-ctl-cysE</i> Gene Cluster
Dipeptidase	peptidase M29 family	PepS	Lacticaseibacillus rhamnosus (strain ATCC 53103 / LMG 18243 / GG) (Lactobacillus rhamnosus)	A0A7S7FP94 · A0A7S7FP94_LACRG	MTLSNFNESLKKYAELAVDIGVSVKPGDTVYVQISVDQAQLARLIVAAAYQRGAAEVQVQWFDDVLKRLDMAHMADERLFNIPAFVKGQFDYWVDHQAKRITVVSSDPDNLAGIDSNRIAKYQEAFAKAYKRLMEAISSMSISWTIIGAASPRWAQKVFPDAATPEEATELLWEAIFKTTRIDQPDPEAAWKAHDQKLREKAAWLNNEQFDQLHYMAPGTDLVVGLPKNHIWEGAGAFNPRGEEFMANMPTEEVFTAPDFRRIDGTVVSTKPLSYGGNILEDMHFTFKDGQIVEAHAKQGDDVLQNLLKTPGARSLGEVSLVPDPSPISQSGLIFFNTLFDENASDHMALGQAYPFSVKDGVAMTNEQRAAVGLNQSPTHVDFMMGSAAMNIDGIKPDG…	411	BAI41529.1
Dipeptidase	peptidase C69 family	PepD	Lactobacillus helveticus (Lactobacillus suntoryeus)	A0A3S8SBT1 · A0A3S8SBT1_LACHE	MKKDNCTAMLVGKDASIDGSTMIARDEDGYGGINEKLFVVNKARHYDEDYVSKYNGFKMHLEGDGCKWTAAPTADDSEGRWDEQGINEYNVAMSATETEATNARCLGHDPLVEDGINEDSMVYITLPFVKTAREGVLRLGRLIEKYGTGETNGIAFSDNKEVWYLETGAGHQWVAARVPDDSYAICPNIMVIQHVDFDDPDNFMYSEGIQEFVEKNHLNNSTDGSFSFRDIFGTKDEADAFYNTPRTWYGQKLFNPSIEQDPTSQEMPFTRVPEKKIGVEDVQKFLSSHYNGTPYDPMHTFSSGSEKEQKMFRSIALDRNQESSILQIRNDVPAKMAAIQWINMGFYAYSPYVPFYTNIEDTPLNYKVAEHTVDPDSSAYWLYKTLQVIVEPRYHQYIY…	475	AZK91332.1	Protein founded in Kim Complete genome sequence of Lactobacillus helveticus
Dipeptidase	peptidase C69 family	PepD	Lactobacillus helveticus (Lactobacillus suntoryeus)	Q48558 · PEPDA_LACHE	MKQTECTTILVGKKASIDGSTMIARSEDGGRVIIPEGFKVVNPEDQPKHYTSVISKQKIDDEDLAETPLRYTSAPDVSGKNGIWGAAGINADNVAMTATETITTNSRIQGVDPILDPSEGGLGEEDFVTLTLPYLHSAFDGVKRVGYLVEKYGTYEMNGMAFSDKDNIWYLETIGGHHWIARRIPDDAYVIAPNRLNIDTFDFDDSENFATASDLKDLIDEYHLNPDREGYNMRHIFGSSTIKDAHYNNPRAWYIHNYFDPDFGGTPADQDQPFICRANRLISIEDIKWAESSHYQDTPYDAYGDQGTPEQKKTFRPIGINRNFETHILQIRNDVPAEIAGVQWLAFGPNTFNSMLPFYTNVTTTPEAWQTTPKFNLNKIFWLNKLTAQLGDTNYRVYG…	474	AAC43971.1 o CAA86210.1	Protein founded in Dudley Sequencing, distribution, and inactivation of the dipeptidase A gene (pepDA) from Lactobacillus helveticus CNRZ32 e di Vesanto Molecular characterization, over-expression and purification of a novel dipeptidase from Lactobacillus helveticus
Dipeptidase	peptidase M20A family	PepV	Lacticaseibacillus casei (Lactobacillus casei)	A0AAN1C6X3 · A0AAN1C6X3_LACCA	MAINWQQEAEKLEPQLLSDLTTLLKINSERDTEHKTAEYPLGPGPAKALDAFLAIAERDGFKTLNVDHVAGRIELGSGPETLGLFGHVDVVPAGPGWKTDPFDPVIRDGKIYGRGTSDDKGPSIAAYYALKLVRDLGLPINKKIHFILGTDEESDWVGMHRYLESEPAPDFGFSPDAEFPIINGEKGIASFKIVQKPVAAAEAQLTLNEFSAGIRPNMVPQEAKATITGDLPESFATQVSDWADQQGVKLTLTLGNPTTIEIVGKGAHAQEPKDGKNAATYLASLLADLPFDPAGKAYLTMIAKYLHLDSRGHHLGINYTDKLMGELTASPDIFTFTQDGEQSVLVNVRYPQGTDADKIRDQIESAVGADQFDVSLSGHAQEPHYVPGDDPLVKTLLQT…	467	ARY90891.1	Protein founded in Ai Complete genome sequence of the probiotic strain Lactobacillus casei BD- II
Dipeptidase	peptidase M20A family	PepV	Lacticaseibacillus casei DSM 20011 = JCM 1134 = ATCC 393	A0AAD1ESD1 · A0AAD1ESD1_LACCA	MEPQLLSDLTTLLKINSERDTEHKTAEYPLGPGPTKALDAFLAIAERDGFKTLNVDHVAGRIELGSGPETLGLFGHVDVVPAGPGWKTDPFDPVIRDGKIYGRGTSDDKGPSIAAYYALKLVRDLGLPINKKIHFILGTDEESDWVGLHRYLESEPAPDFGFSPDAEFPIINGEKGIASFKIVQKPVAAAEAQLTLNEFSAGIRPNMVPQEAKATITGDLPESFATQVSDWADQQGVKLTLTLGNPTTIEIVGKGAHAQEPKDGKNAATYLASLLADLPFDPAGKAYLTMIAKYLHLDSRGHHLGINYTDKLMGELTASPDIFTFTQDGEQSVLVNVRYPQGTDADKIRDQIESAVGADQFDVSLSGHAQEPHYVPGDDPLVKTLFANFH	390	BAN73760.1	Protein founded in Toh Genomic adaptation of the Lactobacillus casei group
Dipeptidase	peptidase M20A family	PepV	Lacticaseibacillus chiayiensis	A0A4Q1TKR4 · A0A4Q1TKR4_9LACO	MAINWQQEAEKLEPQLLSDLTTLLKINSERDTEHKTSQYPLGPGPAKALEAFLAIAERDGFKTLNVDHVAGRIELGSGSEIFGLFGHVDVVPAGPGWQTDPFNPVIRDGKIYGRGTSDDKGPSIAAYYALKLIRDLGLPINKKIHFILGTDEESDWVGMHRYLESEPAPDFGFSPDAEFPIINGEKGIASFKIVQKPVAAAEAELTLNEFSAGIRPNMVPQEAKVTITGDLPESFAAQVNDWADQQGVKLTLTLGNPTTIKIVGKGAHAQEPKDGKNAATYLASLLVDLPFDPAGKAYLTMIAKYLHLDSRGHHLGINYTDKLMGELTASPDIFTFTQDGEQSVLVNVRYPQGTDADKIRDQIESAVGADQFDVSLSGHAQEPHYVPGDDPLVKTLLQT…	467	RXT19104.1	Protein founded in Huang Lactobacillus chiayiensis sp. nov., a lactic acid bacterium isolated from compost
Dipeptidase	peptidase M20A family	PepV	Lacticaseibacillus paracasei (Lactobacillus paracasei)	A0AAP4JMF9 · A0AAP4JMF9_LACPA	MTINWQQEAEKLEPQLLSDLTTLLKINSERDTDHQTKAYPLGPGPAKALEAFLTIAERDGFKTLNVDNVAGRIELGSGDEIFGLFGHVDVVPAGPGWQTDPFVPVIKEGKIYGRGTSDDKGPSIAAYYALKLIRDLGLPINKKIHFIIGTDEESEWVGIHRYLETQPAPDFGFSPDAEFPIINGEKGIASFKIDQKPIAAAPAELTLTNFSAGIRPNMVPQVATATITGNLPETFATQATAWADEAGVKLTLTLGNPTTIEVVGKGAHAQEPKDGKNAGTYLANLLADLPFDPAGKAYLLMVAKYLHNDSRGKLLGINYTDKLMGELTASPDIFTFTQDGEQSVLVNVRYPQGTDADTIRDQIETTLGADKVTVSISGHAQGPHYVPGDDPLVKTLLQT…	467	MDM7455000.1	Protein founded in Kim Newly isolated Lactobacillus paracasei strain modulates lung immunity and improves ability to cope with influenza virus infection
Dipeptidase	peptidase M20A family	PepV	Lacticaseibacillus paracasei subsp. paracasei Lpp123	A0A829GKK6 · A0A829GKK6_LACPA	MNSERDTDHQTKAYPLGPGPAKALEAFLTIAERDGFKTLNVDNVAGRIELGSGDEIFGLFGHVDVVPAGPGWQTDPFVPVIKDGKIYGRGTSDDKGPSIAAYYALKLIRDLGLPINKKIHFIIGTDEESEWVGIHRYLETQPAPDFGFSPDAEFPIINGEKGIASFKIDQKPIAAAPAELTLTNFSAGIRPNMVPQVATATITGDLPETFATQATAWADEAGVKLTLTLGNPTTIEVVGKGAHAQEPKDGKNAGTYLANLLADLPFDPAGKAYLLMVAKYLHNDSRGKLLGINYTDKLMGELTASPDIFTFTQDGEQSVLVNVRYPQGTDADTIRDQIETTLGADKVTVSISGHAQGPHYVPGDDPLVKTLLQTFTDHTGIPGHEQVIGGGTYGRIIKR…	442	EPC57906.1	Protein founded in Smokvina Lactobacillus paracasei comparative genomics: towards species pan-genome definition and exploitation of diversity
Tripeptidase	peptidase M20A family	PepV	Lacticaseibacillus paracasei subsp. paracasei Lpp71	A0A8E0MEQ9 · A0A8E0MEQ9_LACPA	KHLMLITLPVALSLAAVTRSLVCFGHVDVVPAGPGWQTDPFVPVIKDGKIYGRGTSDDKGPSIAAYYALKLIRDLGLPINKKIHFIIGTDEESEWVGIHRYLETQPAPDFGFSPDAEFPIINGEKGIASFKIDQKPIAAAPAELTLTNFSAGIRPNMVPQVATATITGDLPETFATQATAWADEAGVKLTLTLGNPTTIEVVGKGAHAQEPKDGKNAGTYLANLLADLPFDPAGKAYLLMVAKYLHNDSRGKLLGINYTDKLMGELTASPDIFTFTQDGEQSVLVNVRYPQGTDADTIRDQIETTLGADKVTVSISGHAQGPHYVPGDDPLVKTLLQTFTDHTGIPGHEQVIGGGTYGRIIKRGVAFGAQMPGQENVMHQANEYMPIKDIITAVAIYAD…	406	EPC74776.1	Protein founded in Smokvina Lactobacillus paracasei comparative genomics: towards species pan-genome definition and exploitation of diversity
Tripeptidase	peptidase M20A family	PepV	Lacticaseibacillus rhamnosus (strain ATCC 53103 / LMG 18243 / GG) (Lactobacillus rhamnosus)	A0A7S7JGR3 · A0A7S7JGR3_LACRG	MTINWQQEAEKLEPQLLSDLTTLLKINSERDTDHQTDEYPLGPGPAKALEAFLTIAQRDGFKTLNVDHVAGRIELGDGDEIFGLFGHVDVVPAGPGWQTDPFDPVIRDGKIYGRGTSDDKGPSIAAYYALKLIRDLKLPINKKIHFILGTDEESDWVGIHRYLETEPAPDFGFSPDAEFPIINGEKGIASFEIVQKPIAAATADLTLNHFSAGIRPNMVPQEAKAVISGPLPEAFVTQAEKWTTEQEVTFTLTPGNPTTIELIGKGAHAQEPKDGKNAATYLATLLADLPFDPAGKAYLTMIANHLHLDSRGHNLGINYTDKLMGDLTASPDIFTFTQDGPQSVLVNVRYPQGTDAAKIRDQIETALGADQYNVAVSGHAQEPHYVSGDDPLVKTLLQT…	467	AXI93768.1 o BAI41301.1	Protein founded in Morita Complete genome sequence of the probiotic Lactobacillus rhamnosus ATCC 53103 e Protein founded in Toh Genomic adaptation of the Lactobacillus casei group
Tripeptidase	peptidase M20A family	PepV	Lacticaseibacillus rhamnosus LRHMDP3	A0AB33XUZ6 · A0AB33XUZ6_LACRH	MKNETLAALYDAHRTTFIQALRQIMQIKSVRGPQQADAPFGRGPRAALTAAAELGKAYGFKTGIVNSAMAYIQWGDDDQHYIGIVGHLDVVPAGETDWHFPPYDLSEKAGRLYGREILDNKGPSIACLFAMKLLKDAGFQPKRTIRLILGSDEESGSADVPLYLAKEAPPEFGFTPDCKFPVVYGERGIVNFNLRTPITDDSLDKVATITGDQASDHVPDHLQARINDKHYTASGIRAPSNAPELGKNAITTLAKELLDEHAIHGQFANYCRWLVQTLANQHHGEGLGMDFADAASGRLIVTPYQLQKIGAVISLRVAVRYPVTYQEHDVTRALTAAVFPRTQITVIRSMPGILHDKNDPRLAALTQAYEQVTGRDGQPVTTTGATYARKMPNIVAFGP…	439	EKS51455.1
Tripeptidase	peptidase M20A family	PepV	Lacticaseibacillus zeae DSM 20178 = KCTC 3804	A0A0R1EN90 · A0A0R1EN90_LACZE	MAINWQQEAEKLEPQLLSDLTTLLKINSERDTAHKTAEYPLGPGPAKALDAFLAIAERDGFKTLNVDHVAGRIELGSGPETLGLFGHVDVVPAGPGWQTDPFDPVIRDGKIYGRGTSDDKGPSIAAYYALKLVRDLGLPINKKIHFILGTDEESDWVGMHRYLESEPAPDFGFSPDAEFPIINGEKGIASFKIVQKPVAAAEAQLTLNEFSAGIRPNMVPQEAKATITGDLPESFATQVNDWADQQGVKLTLTLGNPTTIEIVGKGAHAQEPKDGKNAATYLASLLADLPFDPAGKAYLTMVAKYLHLDSRGHHLGINYTDKLMGELTASPDIFTFTQDGEQSVLVNVRYPQGTDADKIRDQIESAVGAEQFDVTLSGHAQEPHYVPGDDPLVKTLLQT…	466	KRK10767.1	Protein founded in Sun Expanding the biotechnology potential of lactobacilli through comparative genomics of 213 strains and associated genera
Tripeptidase	peptidase M20A family	PepV	Lactobacillus delbrueckii subsp. lactis	P45494 · PEPV_LACDL	MDLNFKELAEAKKDAILKDLEELIAIDSSEDLENATEEYPVGKGPVDAMTKFLSFAKRDGFDTENFANYAGRVNFGAGDKRLGIIGHMDVVPAGEGWTRDPFKMEIDEEGRIYGRGSADDKGPSLTAYYGMLLLKEAGFKPKKKIDFVLGTNEETNWVGIDYYLKHEPTPDIVFSPDAEYPIINGEQGIFTLEFSFKNDDTKGDYVLDKFKAGIATNVTPQVTRATISGPDLEAVKLAYESFLADKELDGSFEINDESADIVLIGQGAHASAPQVGKNSATFLALFLDQYAFAGRDKNFLHFLAEVEHEDFYGKKLGIFHHDDLMGDLASSPSMFDYEHAGKASLLNNVRYPQGTDPDTMIKQVLDKFSGILDVTYNGFEEPHYVPGSDPMVQTLLKVY…	470	CAA83252.1	Protein founded in Vongerichten Cloning and nucleotide sequence analysis of pepV, a carnosinase gene from Lactobacillus delbrueckii subsp. lactis DSM 7290, and partial characterization of the enzyme e di Jozic Crystal structure of the dinuclear zinc aminopeptidase PepV from Lactobacillus delbrueckii unravels its preference for dipeptides
Tripeptidase	peptidase M20A family	PepV	Lactobacillus helveticus (Lactobacillus suntoryeus)	A0A6A7K487 · A0A6A7K487_LACHE	MNLDYKKLAAAKKDDILRDLDELISIDSSEDLDNTSAEYPVGPGPVKAMKKFLSFAKRDGFHIKNVDNYAGRVDYGDGEKRLGIIGHMDVVPAGDGWNTDPFKMLIKDGKIIGRGSADDKGPALAAYYGMLLLKEAGFTPKKKINFIVGTNEETNWVGIDHYLKHEPTPDQVFSPDAEYPIINGEQGIYTLILNFKDNAQTGSVKLEKFTAGIAENVTPQKAYATISGADLANIKEQFTKFLADNDLEGNFEINGDEAKIELTGQGAHASAPQVGRNAATFLGKFLNQFDFAGRDKNYLNFLANVEHEDFKGEKLGVAHHDDLMGDLSSAPSIFEYQADGDAILKDNIRYPQGTDPNKMVKQVEEKFSDILTASFNSFEEPHYVPGDDPLVKTLLKVYE…	467	MPW15228.1	Protein founded in Cho Draft genome sequences of Lactobacillus strains
Proline peptidase	peptidase M20B family	PepT	Lacticaseibacillus paracasei (Lactobacillus paracasei)	A0AAX3CEE2 · A0AAX3CEE2_LACPA	MTIHIDLPQLQADFIRYAKVNTRSYPGRDTTPSTPGQTELAKLLVAQLKDLGLQDVGLNPANGFVTATLPANTDKPTKSFGIIAHLDTADYNAENVQPQVHPNYDGKPIHFDNGLSLTVEQFPALKRYFGQTLITGDGTTLLGVDDKAGIAGAVSTARYLLAHPEVKHGLIKFGFGPDEEIGTGADKFDAKGFATDFAYTLDNGDPGQIEYETFNAAQATVTIEGTSVHPGEAKDLMINANTLGRQLDAALPLFDRPEFSDGHKGYFLLLKFHGEISDAQLVYIIRDFDRQKFDARKAYFMKTIDELNAPFDHPRFKVEMHDQYYNMADIINKDPYPLRLAEAGIQAAGMTPKTIPFRGGTDGSKITYQGIPTPNLFNGGINFHGPYEVVSTEAMGKIA…	415	UWY24883.1	Protein founded in Colautti Draft genome sequences of 14 Lacticaseibacilli, representatives of a collection of 200 strains
Proline peptidase	peptidase M20B family	PepT	Lacticaseibacillus rhamnosus (strain ATCC 53103 / LMG 18243 / GG) (Lactobacillus rhamnosus)	A0A7S7FME1 · A0A7S7FME1_LACRG	MTIELDLNQIQTDFIRYAKINTRSYPGRATTPSTPGQTELAKLLVTQLQELGLQDVGLNPENGFVTATLPANTDKPVKSFGIIAHLDTADYNAENVQPQVHPHYDGKPINFANGLSLTVEQFPALKQYFGQTLITSDGTTLLGVDDKAGIAGAVAAARYLLAHPEVKHGLIKFGFGPDEEIGVGADKFDAKGFATDFAYTLDNGDPGQIEYETFNAAQATVTIEGTSVHPGEAKGLMVNANTLGRQLDAALPAFDRPEFSAGHEGYFLLLKFHGEISDAELVYIIRDFDHQQFEARKAYFQKTIDELNAQFDHPRLKVEMHDQYYNMADIINKDPYPLRLAEAGIKAAGLTPKTVPFRGGTDGSKITYQGIPTPNLFNGGINFHGPYEVVSTEAMGKIA…	415	AXI93373.1 o BAI40872.1	Protein founded in Morita Complete genome sequence of the probiotic Lactobacillus rhamnosus ATCC 53103 e Protein founded in Toh Genomic adaptation of the Lactobacillus casei group
Proline peptidase	peptidase M20B family	PepT	Lacticaseibacillus zeae (Lactobacillus zeae)	A0A5R8LGE5 · A0A5R8LGE5_LACZE	MTIDLDLAQIQADFIRYAKINTRSYPGRDTTPSTPGQTELAKLLVQQLQDLGLQDVSLNAKNGFVTATLSANTDKPVKSFGIIAHLDTADYNAENVQPQVHPHYDGSPIEFANGLQLTVEQFPALKQYFGQTLITGDGTTLLGVDDKAGIAGAVATARYLLAHPEIKHGLIKFGFGPDEEIGVGADKFDAKGFATDFAYTLDNGDPGQIEYETFNAAQATVTIEGTSVHPGEAKGLMVNANTLGRELDAALPAFDRPEFSAGHEGYFLLLKFHGEISEAQLTYIIRDFDHQQFEARKAYFQKVADELNAQFDQPRLKVTMYDQYYNMADIINKDPYPLRLAEAGIKAAGLTPKTVPFRGGTDGSKITYQGIPTPNLFNGGINFHGPYEVVSTEAMGKIA…	415	TLF35686.1	Protein founded in Huang Genome-based reclassification of Lactobacillus casei as Lactobacillus casei subsp. casei. subsp.nov., description of Lactobacillus casei subsp. zeae subsp. nov., and emended description of Lactobacillus casei
Proline peptidase	peptidase M20B family	PepT	Lactobacillus delbrueckii subsp. lactis DSM 20072	A0AAC9VP15 · A0AAC9VP15_LACDL	MEYPTLLPRFLKYVKINSRSDEHADRFPSTQREVDYQMVIMKELEELGLSDVHYNEKAGTVIATIPSNVDWDVPVMGFLAHCDTADFNSENVKPQITENYDGESKIQLGDSEFYLDPAVFPNLKKYKGQTIISASGDTLLGGDDKCGDAELVTFAEYLLAHPEIKHGEIRLGFTPDEEIGTGAQHFDVEDFNAAFAFTVDGEGPGKLDWGTFSAAQFELDIQGVNVHPAVAKGQMINAIQVGIDFQNSLPQDEVPEKTEGEEGFYHLMDFSGTVDNAHLAYIIRDFKRDGLEARKNLVKEKVAELNAKYGERIKLKMWDQYYNMADELAKHMEIIDLARDAYRACGLTEINEEPVRGGTDGSQLTYMGLPCPNLFAGEENMHGRYEYTVLESMWKAVDV…	412	ASW12112.1	Protein founded in Lee Genome sequencing of Lactobacillus delbrueckii subsp. lactis DSMZ20072T
Proline peptidase	peptidase M20B family	PepT	Lactobacillus delbrueckii subsp. lactis DSM 20072	A0AAC9VJB0 · A0AAC9VJB0_LACDL	MAFSDFDFLEKNFIHYAKEDTQSKYANKDQVSTTPNQVKMMKELADQVKDYDLESYYNEKTAFAIGHLAANTAGVAPIGFFAHVDTVEFDDRFPIRPQVHRDYQGQKLALDEANGIFLDPEEFPDLLTLKGQTLITSDGKTVLGTDDKAGVAGLLAALKYLHEHPEVEHGDIYVAFGPDEEIGLGGQRFDPADFPGVEFAYTLDNGRPGDFEYETFNASAADLTIKGTVVHPGEAYGLLVNATTIMTEFLAALPQDQVPEKSRGHEGFIMVTDAQSSVDSAHVGLIIRDFDWDEFLAKENLVKKLVASLEEKYGPDRFQLDLRRQYENIYNGVKDRPYVVNLALDSYEKAGLAPNVQTFRGGTDGNFITKKGIPTPNLFNGGGNYHGRYEYVTVEQMDK…	428	ASW11481.1	Protein founded in Lee Genome sequencing of Lactobacillus delbrueckii subsp. lactis DSMZ20072T
Proline peptidase	peptidase M20B family	PepT	Lactobacillus helveticus (Lactobacillus suntoryeus)	Q9L4G1 · PEPT_LACHE	MEYPNLLPRFLKYVKVNSRSDENSDRFPSTEREENFQKNVIMKDLEELGLSDIHYNQKAGSVIAEIPSNVDYDVPVMGFLAHSDTADFNSENVKPQIHKNYDGESKIQLGDSEFYLDPEVYPNLRKYKGQTIITASGDTLLGADDKCGISELMTFAEYLMNHPEVKHGKIRLAFTPDEEIGTGAEQFDVKDFGADFAFTVDGEAPGKLGDCTFSAAQFTLDIQGVNVHPAVAKGQMINAVQVGIDFHNQLPEHDRPEHTDGREGFFHLLSFDGTVDHAHLAYIIRDFERDGLEERKNLVKSIVKKMNDEFGTERIKLQMNDQYYNMADELKKHMDIVDLARDAYKAEGLEVNEDPVRGGTDGSQLTYMGLPCPNIFAGEENMHGRYEYTVLESMYKTVD…	413	CAB72938.1	Protein founded in Savijoki Purification and molecular characterization of a tripeptidase from Lactobacillus helveticus
Proline peptidase	peptidase M20B family	PepT	Lactobacillus helveticus (Lactobacillus suntoryeus)	Q2VWB4 · Q2VWB4_LACHE	MSFYDLSYEQDKFIHYAKENTRSFFEHHDHIPSSPGQVALAKELVRELKDMGLDAYYNDKTAFTIGKLAKNTTDEVTPIGFFAHVDTADFNAENIKPQVHPNYDGGKVYLDKDEAIVLDPAEFPDLLNLKGQTLITSDGHTLLGVDDKAGIVGALSMLRYLVEHPEVKHGDVYVAFGPDEEIGCGGKYFDPHDFPGVQFAYTLDNGRPGDFSYDTFNASESTIHIKGTVVHPGEAYGLMVNATTLMNEFLSALPQNEVPEKSRNHEGFFLVIDTTGTVDHADISMIIRDFEWDKFIAKENLIKKIVHKLNEKYGSDRFTVKIRRQYENIYNGLKDKPYIVNLALDAYRKCGLTPHVQSFRGGTDGNFITPKGIPTPNLFNGGGNYHGRYEYVTVEQIDK…	428	AAV80220.1 o PXZ13747.1	Protein founded in Callanan Bioinformatic analysis of the peptidase genes of Lactobacillus helveticus DPC4571 and correlation with enzyme activities detected in cell free extracts e di Moser Cell lysis in Lactobacillus helveticus
Proline peptidase	peptidase S33 family alpha/beta hydrolase	PepR	Lacticaseibacillus casei (Lactobacillus casei)	A8J6X4 · A8J6X4_LACCA	MKQGTTILTLDNGYHLWTNTQGEGDIHLLCLHGGPGGTHEYWENFGEELADLGVQVHMYDQLGSFYSDQPDYTDPEIAKKYLTTDYFLGEVEEVRQKLGLDHFYLIGQSWGGALTQLYALKYGQHLKGAIISSMVDNINEYVDHINLVREEALPPSAVKYMKKIEKAGNWDDPQYQKYVDVLNRGYVDRKQPPAISHLISTMATPVYNAFQGDNEFVVTGKLKNWDISDQIHNIKVPTLLTFGEHETMPLKSAQRMAEVIPHARLVTTPDGGHHHMIDNAPVYFKHLKQFISDVENGTFND	301	BAF85813.1 o BAF85814.1	Protein founded in Fujimoto Direct sequencing of pepR from Lactobacillus casei group
Proline peptidase	peptidase S33 family alpha/beta hydrolase	PepR	Lacticaseibacillus rhamnosus (Lactobacillus rhamnosus)	O69785 · O69785_LACRH	MKQGTTILTSDNGYHLWTNTQGEGDIHLLCLHGGPGGTHEYWENFGEELADLGVQVHMYDQLGSFYSDQPDYSDPEIAKKYLTTDYFLGEVEEVRKKLGLDHFYLIGQSWGGALTQLYALKYGQHLKGAIISSMVDNINEYVEHINLVREEALPPSAVKYMKKIEKAGDWDDPQYQKYVDVLNRGYVDRKQPPAISHLISTMATPVYNAFQGDNEFVVTGKLKNWDISDQIHNIKVPTLLTFGEHETMPLKAAQRMAEVIPHARLVTTPNGGHHHMIDNAPVYFKHLKQFISDVENGTFND	301	BAF85816.1 CAA06029.1 NVO89159.1 NZA05442.1 ONN74356.1	Protein founded in Fujimoto Direct sequencing of pepR from Lactobacillus casei group
Proline peptidase	peptidase S33 family alpha/beta hydrolase	PepR	Lacticaseibacillus zeae (Lactobacillus zeae)	A8J6Y2 · A8J6Y2_LACZE	MKQGTTILTLDNGYHMWTNTQGEGDIHLLCLHGGPGGTHEYWENFGKELADLGVQVHMYDQLGSFYSDQPDYSDPEIAKKYLTTDYFLGEVEEVRKKLGLDHFYLIGQSWGGALTQLYALKYGQHLKGAIISSMVDNINEYVEHINLVREEALPPSAVKYMKKIEKAGKWDDPQYQKYVDVLNRGYVDRKQPPAISHLISTMATPVYNAFQGDNEFVVTGKLKDWDISDQIHNIKVPTLLTFGEHETMPLKAAQRMAEVIPHARLVTTPNGGHHHMIDNASVYFKHLKQFISDVENGTFNE	301	BAF85817.1	Protein founded in Fujimoto Direct sequencing of pepR from Lactobacillus casei group
Proline peptidase	peptidase M24 family Creatinase/methionine aminopeptidase superfamily Creatinase/prolidase N-terminal domain	PepP	Lactobacillus delbrueckii subsp. delbrueckii	A0A4Q7DV32 · A0A4Q7DV32_9LACO	MSKNNELLSLLTRRIKGTADLIKDKDADALLVFNRANYRYLTNFTGEEAQLIITKNGDRVLLSDSRFAPQIEAQAVGELKVVMKHGHEAAEIAAEVKKLGVKKLLVEAEFVSAYEYDAIKSQLPDVDLVMAAEIVERVRNVKDDLELATLKKAVEISERAFEEVLPMLKPGAKERDVGAKLDYLFKLYGGDGPGYDSIIASGPRSSWAHGVASDRLMQEHELVVIDAAASYNGYTADITRTYALGSVEDELEKIYKIVLEAQKRGIAAAVAGATGKDVDQAARGYINDAGYGQYFGHGIGHGIGLEIHEMCQPEFLFSQTTLENGIVHTVEPGIYLPQGGVRIEDDILVNGDTPKVLSTLPKDELIHL	368	RZM16280.1
Proline peptidase	peptidase M24 family Creatinase/methionine aminopeptidase superfamily Creatinase/prolidase N-terminal domain	PepP	Lactobacillus helveticus (Lactobacillus suntoryeus)	A0A0R2MJQ3 · A0A0R2MJQ3_LACHE	MENKQELLTLINNRINQVTALIKEHNADAMIIFNQANYRYLTNFTGEEAQLILTANGERTLLSDSRFAGQIKAQVPGEMDVVMKHSSDYEELTNALKKMNVKKVLVEGEFVSASEFSKLKELNPDIDFEMVEELVERVRNVKDELEIAALRKAIDISMESFKGIFPMIKPGVKERAIGAKLDYLFKVNGGDGPDFETIVASGVRSAWAHGVASDKELEEGDMIVIDFGSFYHGYAADITRTIALGEVDEEMHKIYDIVHEAQRRGIEAAVVGNTGHDVDKAARDYITQQGYGKYFGHGIGHGIGLEIHELCQPALPFKTTKLVNNMVHTVEPGIYLPDKGGVRIEDDILIHDQTPETLSTLPKDELISL	369	AZK90380.1 o GFO99111.1	Protein founded in Kim Complete genome sequence of Lactobacillus helveticus
Proline peptidase	peptidase M24 family Creatinase/methionine aminopeptidase superfamily Creatinase/prolidase N-terminal domain	PepQ	Lacticaseibacillus rhamnosus (strain LMS2-1)	C2K1P4 · C2K1P4_LACRM	MNEHLAALQTWIGEEGLDLAYISDPININYYTGFFQDPEERITALIVAPDHDPFLFTPQLTIEEVKKAGWAYPVFGYLDHEDPFAKLASHIKTVNPNPTKWAIEKDNLAVFKFEAIMKQFPDATFPIDASRFIEKQRLIKTASEIKQMEAAGAQADRAFQAGFNAIKAGATEQEVAAEIDYAMMKEGVMHMSFGTIVQAGVDAANPHGEPMGTKLAPNELVLFDLGTDNHGYMSDATRTVAFGQVTGKPREIFDICLEANLTAMDAVKPGLKASELDKIARDIITKAGYGEYFNHRLGHGIGMSTHEFPSIMEGNDMILQPGMCFSIEPGIYVPGVAGVRIEDCVHVTETGCEPFTHTSKEFTVING	367	EEN78788.1
Proline peptidase	peptidase M24 family Creatinase/methionine aminopeptidase superfamily Creatinase/prolidase N-terminal domain	PepQ	Lactobacillus delbrueckii subsp. lactis	P46545 · PEPQ_LACDL	MNLDKLQNWLQENGMDVAYVSSPTTINYFTGFITDPEERIFKLFAFKDAEPFLFCPALNYEEAKASAWDGDVVGYLDSEDPWSKIAEEIKKRTKDYQNWAVEKNGLTVAHYQALHAQFPDSDFSKDLSDFIAHIRLFKTESELVKLRKAGEEADFAFQIGFEALRNGVTERAVVSQIEYQLKLQKGVMQTSFDTIVQAGKNAANPHQGPSMNTVQPNELVLFDLGTMHEGYASDSSRTVAYGEPTDKMREIYEVNRTAQQAAIDAAKPGMTASELDGVARKIITDAGYGEYFIHRLGHGIGMEVHEFPSIANGNDVVLEEGMCFSIEPGIYIPGFAGVRIEDCGVLTKDGFKPFTHTSKELKVLPVKE	368	CAA84379.1 o CAA90911.1	Protein founded in di Klein Cloning and DNA sequence analysis of pepQ, a prolidase gene from Lactobacillus delbrueckii subsp. lactis DSM7290 and partial characterization of its product e Cloning and nucleotide sequence analysis of the Lactobacillus delbrueckii ssp. lactis DSM7290 cysteine aminopeptidase gene pepC
Proline peptidase	peptidase M24 family Creatinase/methionine aminopeptidase superfamily Creatinase/prolidase N-terminal domain	PepQ	Lactobacillus helveticus (Lactobacillus suntoryeus)	O84913 · PEPQ_LACHE	MNLDKLQQWLQDSNNDIAYISNPITISYFTGYSMDPHERIFALLVFKDANPFIFCPALNVEEAKNSEWNGDVFGYLDSEDPWELIADNVRKRTSDTHTWAIEKDDLSVAHYQYLRGEFPNASFTNDVSSFIERLRLYKTPEEIKKLQGAGAEADFAFKIGFDAIRTGVTERSIAGQIDYQLKIQKGVMHESFETIVQAGKNAANPHLGPTMNTVQPNELVLFDLGTMHDGYASDSSRTVAYGTPSDKQREIYEVDREAQQAAIEAAKPGITAEELDSVARDIITKAGYGEYFIHRLGHGIGKNVHEYPSIVQGNDLVLEEGMCFSIEPGIYIPGFAGVRIEDCGVVTKDGFKTFTHTDKDLKIIPIRD	368	AAC24966.1
Proline peptidase	peptidase S33 family alpha/beta hydrolase	PepL	Lacticaseibacillus rhamnosus (strain LMS2-1)	C2JV83 · C2JV83_LACRM	MVIATTKILTLANGYHLWSQKQGKGTTQLLCLHGGPGSDHEIFEEFGNHLADQDISVYMYDQLGSWYSDMPDFSVSKNRNKFFKIDYYVDEIEEVRQLLGLDNFFLLGHSWGGILAQEYALKYGDSKGFRGLIISDMTDDIASYERNIDHERKDLLGSDEVVFMKQCENKGAYTNDRYHRDILKLNTAYIIKHPEHSSKHLIGTKNRALYEYFQGDNEFIVTGALHDWTVADQLYQIKQPTLIIFGSDDTMDKDEGQKMSKRLPNGEFHIINNAGHCSMLDNPKEYFSVLTKFVKRNS	298	EEN81045.1
Proline peptidase	peptidase S33 family alpha/beta hydrolase	PepL	Lactobacillus delbrueckii	Q48531 · Q48531_9LACO	MDQTRIVTLDNGYHLFTRKVNEGPVKLLCVHGGPGDNHEDFDNFKAGLAGKGVEVYSYDQLGSYWSDQPDFSKEENRKYLTVDYFVDELEEVRQKLGLENFYLLGHSWGGLLAQEYAVRYGQHLKAVVIESMIDNLDEYTVNINRERDEMFSPAQVEYMKECEASENFDDAMYQELVAKLYSVYLVRHPENATRHVVSTTNTQVYNYFQGNNEFMMVGKLTEWDFRDKLAQITLPTLLTVGEFDTMPLDAVRRMHHSLKNSRMVVTPDGATATMLTTQMHFSLPYISSSVMLRQGNLWR	299	CAA84382.1	Protein founded in di Klein Molecular cloning and DNA sequence analysis of pepL, a leucyl aminopeptidase gene from Lactobacillus delbrueckii subsp. lactis DSM7290 e Cloning and nucleotide sequence analysis of the Lactobacillus delbrueckii ssp. lactis DSM7290 cysteine aminopeptidase gene pepC
Proline peptidase	peptidase S33 family alpha/beta hydrolase	PepI	Lacticaseibacillus rhamnosus (strain LMS2-1)	C2JUZ0 · C2JUZ0_LACRM	MAKSGPSRLRPLTLRFLTAPARAHFLERSNVWMVVKIKEGYMPFHEYKTYYRIVGEPSADKAPLLIHGGPGSSHNYFELMDDYAETGRQLIMYDQVGCGKSSLPEDPGVYVKETWAEELVALRKFLHLDELHMLGQSWGGMLEMYYLTSFDPQGIKSVMIDGSPASIKLWVQEQHRLIKYLSYEDRAAIAEAERTGDFTNVKYLAANDRYMEKYCWDDPDENSPEPLRRPTNGKRASLIAEGPNEFTENGTISDFDVTDQLHKIHVPVLVTSGTDDLCTPLIAKSVVDHIPGAKWHLFANSRHLALLDQHDEFIHVLDQWLAAND	325	EEN81166.1
Proline peptidase	peptidase S33 family alpha/beta hydrolase	PepI	Lactobacillus delbrueckii subsp. lactis	P46542 · PIP_LACDL	MQITEKYLPFGNWQTYCRIVGEATDRAPLLLLHGGPGSSHNYFEVLDQVAEKSGRQVIMYDQLGCGNSSIPDDQAETAYTAQTWVKELENVREQLGLDQIHLLGQSWGGMLALIYLCDYQPKGVKSLILSSTLASAKLWSQELHRLIKYLPKGEQAAIKEAETTGNYDSPAYQAANAHFMDQHAINVTPDLPEPVLRKKKGGNLAYLTGWGPNEYTPIGNLHGYEYTDRLKDLDLPALITSGTDDLCTPLVAKSMYDHLPNARWELFAGCGHMPFVQENAKYQELLSDWLISQD	294	CAA81556.1	Protein founded in Klein Cloning, heterologous expression, and sequencing of a novel proline iminopeptidase gene, pepI, from Lactobacillus delbrueckii subsp. lactis DSM 7290
Proline peptidase	peptidase S33 family alpha/beta hydrolase	PepI	Lactobacillus helveticus (Lactobacillus suntoryeus)	P52278 · PIP_LACHE	MEIIEGKMPFMGYETYYRIVGERSEKPPLVLLHGGPGSSHNYFEVLDELAQKDGRRIIMYDQLGCGESSIPDDHPELYTKETWVKELEALREHLALRKMHLLGQSWGGMLAIIYMCDYHPEGIQSLILSSTLSSASLWSKELHRMIKYLPIEEQAAIHRAELTGNFNDPDYLKANEHFMNQHAIDMTKTWPECVMRKKRGGTVAYETAWGPNEYTPEGNLHDYEYTDKLSKIKVPTLITSGTDDLCTPYVAKTMQDQIASSKWRLFEGCGHMSFVEKTDEYVALLQEWLDQHDE	294	CAA91231.1	Protein founded in Varmanen An operon from Lactobacillus helveticus composed of a proline iminopeptidase gene (pepI) and two genes coding for putative members of the ABC transporter family of proteins
Proline peptidase	peptidase S15 family	PepX	Lacticaseibacillus casei (strain BL23) (Lactobacillus casei)	B3WEZ5 · PEPX_LACCB	MKLNQFARLTPDFKVQVAELKQIGLQADPDDAFSQSATDLFNAFFPEAYTLAAKEDKLAQVAVNMDQTLAAWLAKKPSKMTRRDFYNVALQLLGFEAFTDFDLNDPFKMMTATKLPSLDHDLTSTADLLKAVYLLLNTRTKHLVSYLDDLANRGFLKDFQKKQKKPTHLLFNGKVQQVFDARQAVREVVWIESDMDTDHDGQRDLLEATIYRPKATDQGLKVPVLFTANPYFHGTNDVTAVTHVPETTLAVKTHGASKAEVTANPEEPANLPHHPVNGEATQAEAYAEENSMYAFNDYFLARGFAVVYSAGVGTRYSDGFRTTGGPEETDGAVAVIEWLTGKRRAFTNRTDGITIKAWWSTGLVAMTGKSYLATLAMAAATTGVDGLKTIVADAGISSW…	797	CAQ66946.1	Protein founded in Maze Lactobacillus casei BL23 complete genome sequence
Proline peptidase	peptidase S15 family	PepX	Lacticaseibacillus casei DSM 20011 = JCM 1134 = ATCC 393	A0AAD1AQX3 · A0AAD1AQX3_LACCA	MKLNQFARLTPEFSQQLTELARIGLPADSQGHFANTAAALYAAFFPEAYQLAAKQDKFAQIAVNSRQNLAEWLASGPTQMTRRDFYNVALQLLGFEAFTDFDLSDPLAFMAATELPSVDHDLLDTRDLLKASYLLLTTRTKHLVNFLDDLANRGFFKDFQSSSTQPKPLLFNGKVQQVFDARQAIREVVWIESDVDSDHDGQRDLLEASIYRPKATEQGLKVPVLFTANPYFHGTNDVTAATHVPETVLAVKSHGASKAEVTATPIQTEDLPKRVVTGEATEAEAYAEENSMYAFNDYFLARGFAVVYSAGVGTRYSDGFRTIGGPEETAGAVAVIEWLTGKRRAFTNRTAGVAIKAWWSTGKVAMTGKSYLATLAIAAATTGVEGLKTIIADAGISSW…	797	BAN74670.1	Protein founded in Toh Genomic adaptation of the Lactobacillus casei group
Proline peptidase	peptidase S15 family	PepX	Lacticaseibacillus casei (strain BD-II) (Lactobacillus casei)	A0A806E4G9 · A0A806E4G9_LACCD	MLMKLNQFARLTPDFKVQVAELKQIGLQADPDDAFSQSATDLFNAFFPEAYTLAAKEDKLAQVAVNMDQTLAAWLAKKPSKMTRRDFYNVALQLLGFEAFTDFDLNDPFKMMTATKLPSLDHDLTSTADLLKAVYLLLNTRTKHLVSYLDDLANRGFLKDFQKKQKKPTHLLFNGKVQQVFDARQAVREVVWIESDMDTDHDGQRDLLEATIYRPKATDQGLKVPVLFTANPYFHGTNDVTAVTHVPETTLAVKTHGASKAEVTANPEEPANLPHHPVNGEATQAEAYAEENSMYAFNDYFLARGFAVVYSAGVGTRYSDGFRTTGGPEETDGAVAVIEWLTGKRRAFTNRTDGITIKAWWSTGLVAMTGKSYLATLAMAAATTGVDGLKTIVADAGIS…	799	AEA57348.1	Protein founded in Ai Complete genome sequence of the probiotic strain Lactobacillus casei BD- II
Proline peptidase	peptidase S15 family	PepX	Lacticaseibacillus chiayiensis	A0A4Q1UD44 · A0A4Q1UD44_9LACO	MKLNQFARLTPEFSQQLTELARIGLPADPKGNFADTAAAMYAAFFPEAYQPAAKQDKFAQIAVDSRQNLAEWLASGPAQMTRRDFYNVALQLLGFEAFIDFDLADPLAYLAATKLPSVDHDLLDTADFLKASYLLLATRTKHLVNFLDDLANRGFFKNFQSSSKQPKPLLFNGKVQQVFDARQAIREVVWIESDVDSDHDGKRDLLEATIYRPKATEQGLKVPVLFTANPYFHGTNDVTAATHVPETVLAVKSHGASKAEVTAGPVQIDDLPKRAVTGEATEAEAYAEENSMYAFNDYFLARGFAVVYSAGVGTRYSDGFRTIGGPEETAGAVAVIEWLTGKRRAFTNRTAGVAIKAWWSTGKVAMTGKSYLATLAIAAATTGVEGLKTIIADAGISSW…	797	RXT29561.1	Protein founded in Huang Lactobacillus chiayiensis sp. nov., a lactic acid bacterium isolated from compost
Proline peptidase	peptidase S15 family	PepX	Lacticaseibacillus paracasei (strain ATCC 334 / BCRC 17002 / CCUG 31169 / CIP 107868 / KCTC 3260 / NRRL B-441) (Lactobacillus paracasei)	Q038E8 · PEPX_LACP3	MKLNQFARLTPDFKVQVAELKQIGLQADPDDTFSQSTTDLFNAFFPEAYTLAAKKDKLAQVAVNMDQTLAAWLAKKPSKMTRRDFYNVALQLLGFEAFTDFDLNDPFKMMTATKLPSLDHDLTSTADLLKAVYLLLNTRTKHLVSYLDDLANRGFLKDFQKKQKKPTHLLFNGKVQQVFDARQAVREVVWIESDMDTDHDGQRDLLEATIYRPKATDQGLKVPVLFTANPYFHGTNDVTAVTHVPETTLAVKTHGASKAEVTANPEEPANLPHHPVNGEATQAEAYAEENGMYAFNDYFLARGFAVVYSAGVGTRYSDGFRTTGGPEETDGAVAVIEWLTGKRRAFTNRTDGITIKAWWSTGLVAMTGKSYLATLAMAAATTGVDGLKTIVADAGISSW…	797	ABJ70424.1	Protein founded in Makarova Comparative genomics of the lactic acid bacteria
Proline peptidase	peptidase S15 family	PepX	Lacticaseibacillus paracasei (Lactobacillus paracasei)	A0A422LW67 · A0A422LW67_LACPA	MLMKLNQFARLTPDFKVQVAELKQIGLQADPDDAFSQSATDLFNAFFPETYTLAAKEDKLAQVAVNMDQTLAAWLAKKPSKMTRRDFYNVALQLLGFEAFTDFDLNDPFKMMTATKLPSLDHDLTSTADLLKAVYLLLNTRTKHLVSYLDDLANRGFLKDFQKKQKKPTHLLFNGKVQQVFDARQAVREVVWIESDMDTDHDGQRDLLEATIYRPKATDQGLKVPVLFTANPYFHGTNDVTAVTHVPETTLAVKTHGASKAEVTANPEEPANLPHHPVNGEATQAEAYAEENSMYAFNDYFLARGFAVVYSAGVGTRYSDGFRTTGGPEETDGAVAVIEWLTGKRRAFTNRTDGITIKAWWSTGLVAMTGKSYLATLAMAAATTGVDGLKTIIADAGIS…	799	RND82052.1 o RNE31293.1	Protein founded in Wuthrich Conversion of Methionine to Cysteine in <i>Lactobacillus paracasei</i> Depends on the Highly Mobile <i>cysK-ctl-cysE</i> Gene Cluster
Proline peptidase	peptidase S15 family	PepX	Lacticaseibacillus rhamnosus (Lactobacillus rhamnosus)	Q9RDW6 · PEPX_LACRH	MKLNQFARLTPDIDQQLKELARIGLPADPQAPFADTAAAMYAAFFPEAYQPAAQQDKFAQVAVNSHQNLAEWLATKPTHMKRADFYNVALQLLGFEAFSDFDLSDPISFMTVTKLPSVAHDLLHTADLLQASYLLLTTRTKHLVSFLDDLANRGFFKDFQAQSSQPAHLLFNGKVQQVFDARQAVREVVWIESDVDSDHDGQRDLLEATIYRPKATDRGLKVPVLFTANPYFHGTNDVTAATHVPETVLAVKPHGASKAEVTAAPASKPKLPARPVTGETKQAAAYAEENSPYAFNDYFLARGFAVVYSAGVGTRYSDGFRTIGGPEETDGAVAVIEWLTGKRRAFTNRTDGVAIKAWWSSGKVAMTGKSYLATLAIAGATTGVEGLKTIVADAGISSW…	797	CAB58995.1	Protein founded in Varmanen X-prolyl dipeptidyl aminopeptidase gene (pepX) is part of the glnRA operon in Lactobacillus rhamnosus
Proline peptidase	peptidase S15 family	PepX	Lacticaseibacillus zeae DSM 20178 = KCTC 3804	A0A0R1EVV8 · A0A0R1EVV8_LACZE	MKLNQFARLTPEFSQQLTELARIGLPADPKGDFADTAAAMYAAFFPEAYQLAAKQDKFAQIAVNSRQNLAEWLASGPTQMTRRDFYNVALQLLGFEAFTDFDLSDPLAFMAATELPSVDHDLLDTRDLLKASYLLLTTRTKHLVNFLDDLANRGFFKDFQSSSTQPKPLLFNGKVQQVFDARQTIREVVWIESDVDSDHDGQRDLLEATIYRPKATEQGLKVPVLFTANPYFHGTNDVTAATHVPETVLAVKSHGASKAEVTTTPIQTEDLPKRVVTGEATEAEAYAEENSMYAFNDYFLARGFAVVYSAGVGTRYSDGFRTIGGPEETAGAVAVVEWLTGKRRAFTNRTAGVAIKAWWSTGKVAMTGKSYLATLAIAAATTGVEGLKTIIADAGISSW…	797	KRK13529.1	Protein founded in Sun Expanding the biotechnology potential of lactobacilli through comparative genomics of 213 strains and associated genera
Proline peptidase	peptidase S15 family	PepX	Lactobacillus delbrueckii subsp. lactis	P40334 · PEPX_LACDL	MKYNQYAYVETSPEKATEELLAINFLPENYSSLSFSELLAVLTGNVLAEATTRQAKDAKLAEFAVDDQTDLAAFLLDTPTAITASQFANVALQLLGYHPNYDYSLTDPLTCGKKHALPAFKDLTSKEELIFTFYRLLNTRSKNGQILLDVMAGKGYFTQFWGEGKFMFFNGKSLPVFDTSQVIREVVYVQSDLDTDGDGKGDLLPVTVFRPVESQDQLKVPALYTASPYFGGIIDNVKTNHNVDENLTDATTWTNPKYVAKPLVKSPAPSDQDVPATELATGQSSYGLNEYLLARGFASVFSGAIGNRHGDGIRITGSPEETISQKEVIEWLTGDRVAYTDRTRRFETKASWCSGNVGMTGRSYLGTLQIAIATTGVKGLKTVVSEAAISSWYDYYREH…	792	CAA78597.1	Protein founded in Meyer-Barton Cloning and sequence analysis of the X-prolyl-dipeptidyl-aminopeptidase gene (pepX) from Lactobacillus delbruckii ssp. lactis DSM7290
Proline peptidase	peptidase S15 family	PepX	Lactobacillus delbrueckii subsp. bulgaricus	Q9Z5K9 · PEPX_LACDE	AYVETSPEKATEELLAINFLPENYSSLSFSELLAVLTGNVLAEATTRQAKDAKLAEFAVDDQTDLAAFLLDTPTAITASQFANVALQLLGYHPNYDYSLTDPLTCGEKHALPAFKDLTSKEELIFAFYRLLNTRSKNGQILLDVMAGKGYFTQFWGEGKFMLFNGKSLPVFDTSQVIREVVYVQSDLDTDGDGKGDLLPVTVFRPVESQDQLKVPALYTASPYFGGIIDNVKTNHNVDENLTDATTWTNPKYVAKPLVKSPAPSGQDVPATELATGQSSYGLNEYLLARGFASVFSGAIGNRHGDGIRITGSPEETISQKEVIEWLTGDRVAYTDRTRRFETKASWCSGNVGMTGRSYLGTLQIAIATTGVKGLKTVVSEAAISSWYDYYREHGLVIAP…	786	CAB38074.1
Proline peptidase	peptidase S15 family	PepX	Lactobacillus helveticus (Lactobacillus suntoryeus)	Q59485 · PEPX_LACHE	MKYNQYAYVETDFQQQVKELIDINFLPKNYQVWDFSSLLAKLVKNAIAEAKTDAAKNAKLAEFAVSDHQTLADFLKEKPTEIGTKQFYNVALQLLGYHVHYDYDFADPTGFMQRNALPFLQDISDNQKLISAFYRLLNTRAKNGQILLDVMAGKGYFTQFWGQNKFKFFNGKSIPVFDTNKVIREVVYVETDLDTDHDGKSDLIQVTVFRPEETNKGLKVPALYTASPYFGGIIANEKRNHNVDENLSDSTEWNDPQYVHSPIVKAEKPDGSSRPATEEAVHKSSYPLNEYMLARGFASVFAGAIGTRGSDGVRITGAPEETESAAAVIEWLHGDRVAYTDRTRTVQTTADWCNGNIGMTGRSYLGTLQIAIATTGVKGLKTVVSEAAISSWYDYYREH…	793	AAB50275.1 o CAA88273.1	Protein founded in Yuksel DNA sequence analysis, expression, distribution, and physiological role of the Xaa-prolyldipeptidyl aminopeptidase gene from Lactobacillus helveticus CNRZ32 e di Vesanto An X-prolyl dipeptidyl aminopeptidase (pepX) gene from Lactobacillus helveticus e di Ojennus Structural characterization of a prolyl aminodipeptidase (PepX) from Lactobacillus helveticus
Proline peptidase	peptidase S15 family	PepX	Lactobacillus helveticus (Lactobacillus suntoryeus)	Q8RQV6 · Q8RQV6_LACHE	MKINQFAHLTVDAKTKARELNQIGFLNCDVQHNDDLNHIWIQFILACLPHLKTPAAKKAYLSDLLATPTLDVVEFKQSQTVDLKTFYLVALQLLDFEAETDFDIDDPLGSMDKLGLYHAQQLNDRTDLINALYDLLCTHTKHGQTLLDRLAALGYFTKFYELPAIKKPLFFNGKAQPIFDTDKLIREVVYVEADVDSDHDGKLDLLKVEIMRPKDTEHGLKVPVLYTASPYNQGTNDSLGAKMLHPATAKLTHKTPTTTSYTDIKFEAKAPNLPPKREVAGRSTRAEETFDRELSYTLNDYFLARGFGVVYAAGIGTRDSEGFRTCGSQEETSSTIAIIEWLTGKRRAFTNRSENIEIKAWWCNKKVAMTGKSYLGTLATAAATTGIEGLETIISEAAI…	803	BAB91143.1	Protein founded in Kimura Nucleotide sequence of the pepX gene of Lactobacillus helveticus IFO3809

## Sheet: TableS3_primer
Supplementary Table S2. Primers, reaction mixtures, and thermal conditions
Target gene	Primer name	Primer sequence (5'->3')	Reaction mixture	Thermal condition
PepX (end-point PCR)	PepX_F3	CAGAAGCCTATGCCGAAGAAA (Sense)	Thermo Scientific DreamTaq Green DNA Polymerase (Thermo Fisher Scientific EP0711) (oligo conc: 0.30 μM; Mg: 2.0 mM; dNTPs: 0.2mM; Na+ 50mM)	94°C for 5 min; (94°C for 30 sec, annealing for 30 sec at 57°C, and extension at 72°C for 1 min)35; 72°C for 10 min
	PepX_R3	ACGAGCCGAACACTAAGAATG (AntiSense)
PepX (RT-qPCR)	PepX_qF2	AGCAGCTACCGATCAGTTTAC (Sense)	10 μL di 2×PowerUp SYBR Green Master Mix, oligo conc: 0.25 μM; Mg: 3mM; dNTPS 0.8 mM; Na+ 5mM, 5 μL di template (5 ng/μL)	50°C for 2 min; 95°C for 2 min; (95°C for 15s anneling for 1 min at 60°C)40. The melting curve was performed from 60°C to 95°C with a temperature gradient of 0.1 °C/s.
	PepX_qR2	GGCTGTTAGCGTAAGCATTATTAG (AntiSense)
16s rRNA (RT-qPCR)	16S_F1	GTAGGTGGCAAGCGTTATCC	10 μL di 2×PowerUp SYBR Green Master Mix, oligo conc: 0.25 μM; Mg: 3mM; dNTPS 0.8 mM; Na+ 5mM, 5 μL di template (5 ng/μL)	50°C for 2 min; 95°C for 2 min; (95°C for 15s, anneling for 1 min at 60°C)40. The melting curve was performed from 60°C to 95°C with a temperature gradient of 0.1 °C/s.
	16S_R1	GATGCGCTTCCTCGGTTAAG

## Sheet: TableS4_ANIb
Supplementary Table S4. Matrix of ANIb values
	L._casei_DSM_20011.fasta	L._chiayiensis_FBL7.fasta	L._paracasei_BL23.fasta	L._rhamnosus_DSM_20021.fna	L._rhamnosus_GG.fasta	PRA205.fna	L_huelsenbergensis.fna	L_styriensis.fna	Lparahuelsenbergenesis.fna	Lzeae_subsp.silagei_DSM_116376T_GCF_030770335.1_ASM3077033v1_genomic.fna	L._zeae_DSM_20178.fna	L._zeae_FBL8.fasta
L._casei_DSM_20011.fasta	*	87.87	78.1	79.01	79.24	94.85	95.43	95.48	95.42	94.13	94.24	94.26
L._chiayiensis_FBL7.fasta	87.96	*	76.72	78.49	78.45	87.74	87.9	88	88.01	87.8	87.78	87.85
L._paracasei_BL23.fasta	78.12	76.66	*	76.83	77.18	78.14	77.72	77.2	77.14	77.16	78.09	78
L._rhamnosus_DSM_20021.fna	78.76	78.41	76.58	*	97.13	78.59	78.66	78.69	78.61	78.83	78.81	78.7
L._rhamnosus_GG.fasta	78.85	78.67	77.05	97.15	*	79.25	78.85	78.73	78.95	79.06	78.66	78.77
PRA205.fna	94.45	87.51	77.82	78.5	78.74	*	95.15	94.94	97.63	95.49	95.09	95.2
L_huelsenbergensis.fna	94.79	87.68	77.45	78.62	78.88	95.09	*	95.6	95.7	93.7	93.4	93.56
L_styriensis.fna	95.21	87.73	77.2	78.62	78.67	94.92	95.7	*	95.99	93.57	93.45	93.52
Lparahuelsenbergenesis.fna	95.18	87.8	77.13	78.65	78.81	97.72	95.89	96.06	*	93.7	93.59	93.6
Lzeae_subsp.silagei_DSM_116376T_GCF_030770335.1_ASM3077033v1_genomic.fna	93.71	87.57	77.1	78.71	78.82	95.48	93.83	93.62	93.57	*	96.39	96.38
L._zeae_DSM_20178.fna	94.03	87.5	77.72	78.7	78.66	95.12	93.46	93.4	93.38	96.28	*	99.39
L._zeae_FBL8.fasta	93.89	87.61	77.9	78.8	79.2	95.25	93.64	93.58	93.52	96.37	99.49	*

## Sheet: TableS5_ANIm
Supplementary Table S5. Matrix of ANIm values
	L._casei_DSM_20011.fasta	L._chiayiensis_FBL7.fasta	L._paracasei_BL23.fasta	L._rhamnosus_DSM_20021.fna	L._rhamnosus_GG.fasta	PRA205.fna	L_huelsenbergensis.fna	L_styriensis.fna	Lparahuelsenbergenesis.fna	Lzeae_subsp.silagei_DSM_116376T_GCF_030770335.1_ASM3077033v1_genomic.fna	L._zeae_DSM_20178.fna	L._zeae_FBL8.fasta
L._casei_DSM_20011.fasta	*	89.37	85.52	84.08	84.68	95.33	95.79	95.93	95.81	94.63	94.72	94.61
L._chiayiensis_FBL7.fasta	89.37	*	84.3	83.95	84.21	89.1	89.31	89.28	89.2	89.19	89.23	89.34
L._paracasei_BL23.fasta	85.51	84.28	*	84.05	85.17	85.56	85.23	84.62	84.12	84.56	85.56	85.72
L._rhamnosus_DSM_20021.fna	84.07	83.95	84.03	*	97.53	84.01	84.04	84.23	84.1	84.28	84.19	84.09
L._rhamnosus_GG.fasta	84.68	84.21	85.14	97.54	*	84.23	84.48	84.44	84.13	84.36	84.12	84.4
PRA205.fna	95.33	89.09	85.55	84.02	84.23	*	95.51	95.52	98.07	95.82	95.69	95.73
L_huelsenbergensis.fna	95.79	89.31	85.22	84.05	84.48	95.52	*	96.13	96.25	94.06	94.07	94.16
L_styriensis.fna	95.93	89.29	84.62	84.24	84.44	95.51	96.13	*	96.34	94.24	94.18	94.24
Lparahuelsenbergenesis.fna	95.81	89.2	84.11	84.11	84.13	98.07	96.25	96.34	*	94.13	94.07	94.16
Lzeae_subsp.silagei_DSM_116376T_GCF_030770335.1_ASM3077033v1_genomic.fna	94.63	89.19	84.56	84.28	84.35	95.83	94.06	94.24	94.13	*	96.86	96.91
L._zeae_DSM_20178.fna	94.73	89.23	85.55	84.19	84.12	95.69	94.05	94.18	94.07	96.87	*	99.56
L._zeae_FBL8.fasta	94.61	89.35	85.71	84.09	84.4	95.74	94.16	94.24	94.16	96.92	99.57	*

## Sheet: TableS6_GGDC 3.0 
Supplementary Table S6. Digital DNA-DNA hybridization analysis carried out with formula 2.
		Formula 2				G+C difference
Query genome	Reference genome	DDH	Model C.I.	Distance	Prob. DDH >= 70%
PRA205	Lacticaseibacillus parahuelsenbergensis (GCF_030770265.1)	80.7	[77.8 - 83.3%]	0.0225	91.14	0.19
PRA205	Lacticaseibacillus huelsenbergensis (GCF_029726355.1)	62.1	[59.2 - 64.9%]	0.0481	59.06	0.11
PRA205	Lacticaseibacillus zeae subsp. silagei (GCF_030770335.1)	64.6	[61.7 - 67.4%]	0.044	66.28	0.21
PRA205	Lacticaseibacillus zeae (GCF_001433745.1)	62.8	[59.9 - 65.6%]	0.0469	61.17	0.08
PRA205	Lacticaseibacillus zeae (GCF_018363055.1)	63.6	[60.7 - 66.4%]	0.0457	63.41	0
PRA205	Lacticaseibacillus styriensis (GCF_030770295.1)	61.6	[58.7 - 64.4%]	0.0489	57.45	0.11
PRA205	Lacticaseibacillus casei (GCF_000829055.1)	61.4	[58.5 - 64.2%]	0.0493	56.77	0.05
PRA205	Lacticaseibacillus chiayiensis (GCF_018363075.1)	35.4	[32.9 - 37.9%]	0.1166	0.74	0.6
PRA205	Lacticaseibacillus rhamnosus (GCF_003353455.1)	24.1	[21.8 - 26.6%]	0.1811	0.01	1.13
PRA205	Lacticaseibacillus rhamnosus (GCF_001435405.1)	23.5	[21.2 - 26%]	0.1861	0	1.14
PRA205	Lacticaseibacillus paracasei (GCF_000026485.1)	24.5	[22.2 - 27%]	0.1781	0.01	1.49
PRA205	Lactobacillus delbrueckii subsp. lactis (GCF_002278095.1)	37.5	[35.1 - 40.1%]	0.1081	1.41	1.22
PRA205	Lactobacillus helveticus (GCF_000160855.1)	49.3	[46.7 - 51.9%]	0.0734	17.14	11.04

## Sheet: TableS7_BLASTKOALA
Supplementary Table S7. BLASTKOALA anaysis of KO assignments in the genome of Lacticaseibacillus sp. strain PRA205.
#	KEGG functional categories	N°	%
1	Carbohydrate metabolism	282	18.3474
2	Protein families: genetic information processing	210	13.663
3	Protein families: signaling and cellular processes	170	11.0605
4	Genetic information processing	162	10.54
5	Environmental information processing	137	8.91347
6	Unclassified: metabolism	89	5.7905
7	Amino acid metabolism	66	4.29408
8	Nucleotide metabolism	60	3.90371
9	Protein families: metabolism	47	3.05791
10	Metabolism of cofactors and vitamins	39	2.53741
11	Glycan biosynthesis and metabolism	36	2.34223
12	Lipid metabolism	35	2.27716
13	Energy metabolism	31	2.01692
14	Unclassificated genetic information processing	24	1.56148
15	Unclassificated singnalic and cellular process	21	1.3663
16	Metabolism to other amino acid	17	1.10605
17	Cellular processes	17	1.10605
18	Metabolism of terpenoids and polyketides	8	0.520494
19	Xenobiotics degradation and metabolism	5	0.325309
20	Organismal system	5	0.325309
21	Humana disease	3	0.195185
22	Biosyntesis of other secondary metabolism	2	0.130124
23	Unclassified	79	5.13988

## Sheet: TableS8_COGdistribution
Supplementary Table S8. Distribution of COG categories among core, disepnable and singleton genes. The dataset included Lacticaseibacillus sp. strain PRA205, L. zeae subsp. zeae DSM 20178T, L. zeae subp. silagei DSM 116376T, L. parahuelsenbergensis DSM 116105T, L. huelsenbergensis DSM 115425T, and L. styriensis DSM 116297T
COG	Core	Dispensable	Singletons
Not annotated	337	364	419
Carbohydrate transport and metabolism	225	187	87
Translation	204	9	8
Amino acid transport and metabolism	166	35	15
Transcription	156	98	42
General function prediction only	154	51	15
Cell wall/membrane/envelope biogenesis	127	36	22
Inorganic ion transport and metabolism	108	15	9
Function unknown	103	28	18
Replication	98	22	22
Signal transduction mechanisms	91	30	8
Carbohydrate transport and metabolism	90	27	8
Nucleotide transport and metabolism	87	6	1
Energy production and conversion	86	15	4
Defense mechanisms	76	54	38
Posttrans. Modification	76	27	12
Lipid transport and metabolism	74	13	5
Cell cycle control	41	10	3
Sec. metabolites biosynthesis	20	2	1
Intracellular trafficking	19	6	0
Cell motility	10	2	4
Extracellular structures	5	0	0
Cytoskeleton	3	0	0
Transposase	2	60	66
RNA processing and modification	0	0	0
Chromatin structure and dynamics	0	0	0
Nuclear structure	0	0	0

## Sheet: TableS9_biosafety
Supplementary Table S9. Biosafety evaluations implemented in ProbioMinServer.
ResFinder
Resistance gene	Identity	Coverage	Phenotype
No hit found
AMRFinder
Gene symbol	Sequence name	Method	Identity
No hit found
VFDB
Gene ID	Gene name	Identity	Coverage
No hit found
Vfinder
Database	Virulence factor	Identity	Coverage
No hit found
PG
Protein ID	Gene name	Identity	Coverage
no hit found
ARGs (CARD)	VFs (VFDB)	PGs (PHI-base)	PPRS
0	0	1	1.00

## Sheet: TableS9_phigaro
Supplementary Table S19. Putative prophage regions predicted by Phigaro in Lacticaseibacillus strain PRA205 and 7 close relatives.
									BLASTn best hit
Species and strain	N of putative prophage	N° possible transponable elements	scaffold	begin	end	transposable	taxonomy	vog	Description	Coverage (%)	Identity	Accession number
L. zeae subsp. silagei DSM 116376	3	0	NZ_CP132484_1	46720	83441	False	Siphoviridae	VOG6495, VOG3851, VOG4552, VOG0181, VOG4967, VOG3642, VOG0321, VOG0322, VOG0226, VOG4566, VOG0189, VOG7018, VOG9860, VOG6623, VOG4693, VOG4567, VOG4567, VOG0195, VOG2820, VOG3643, VOG2338, VOG0198, VOG4643, VOG1345, VOG4841, VOG4581, VOG4544, VOG3644, VOG4556, VOG4568, VOG4553, VOG5601, VOG0204, VOG4589, VOG0539, VOG0704, VOG4586, VOG2225, VOG0083, VOG4605, VOG4599, VOG6455, VOG7896, VOG0861, VOG…	Caudoviricetes sp. isolate ctDWh31, partial genome	0.42	0.9417	BK024900.1
			NZ_CP132484_1	1009953	1020862	False	Siphoviridae	VOG1581, VOG4632, VOG4606, VOG0205, VOG4841, VOG4581, VOG4544, VOG5051, VOG4556, VOG4568, VOG0204	Caudoviricetes sp. isolate ctG1U4, partial genome	0.94	0.8965	BK021574.1
			NZ_CP132484_1	3006095	3016457	False	Siphoviridae	VOG1581, VOG4632, VOG4609, VOG0205, VOG4841, VOG4581, VOG4544, VOG5051, VOG4556, VOG4568, VOG0204	Caudoviricetes sp. isolate ctG1U4, partial genome	0.78	0.9344	BK021574.1
L. zeae subsp. zeae DSM 20178	2	0	NZ_AZCT01000013_1	2160	38839	False	Siphoviridae	VOG0002, VOG6914, VOG2215, VOG3622, VOG4552, VOG0181, VOG10867, VOG4967, VOG3642, VOG0321, VOG0322, VOG0226, VOG4566, VOG0189, VOG4688, VOG7018, VOG9860, VOG6623, VOG4693, VOG9741, VOG9759, VOG4571, VOG2820, VOG3643, VOG1298, VOG0044, VOG3307, VOG0198, VOG7136, VOG4570, VOG10904, VOG4549, VOG9033, VOG4841, VOG4844, VOG4556, VOG4573, VOG4553, VOG0562, VOG4589, VOG0539, VOG0704, VOG4586, VOG5852, V…	Caudoviricetes sp. isolate ctdG111, partial genome	0.4	0.9301	BK047169.1
			NZ_AZCT01000003_1	123749	133905	False	Siphoviridae	VOG1581, VOG4632, VOG4606, VOG0205, VOG4841, VOG4581, VOG4544, VOG1886, VOG5051, VOG4556, VOG4568	Caudoviricetes sp. isolate ctG1U4, partial genome	0.92	0.9727	BK021574.1
L. zeae subsp. zeae FBL8	2	0	NZ_CP074379_1	510048	521260	False	Siphoviridae	VOG4799, VOG0189, VOG0982, VOG5280, VOG5317, VOG3307, VOG0198, VOG5088, VOG4570	Lactobacillus phage BH1, complete genome	0.23	0.9313	NC_048737.1
			NZ_CP074379_1	997188	1008507	False	Siphoviridae	VOG1581, VOG4632, VOG4606, VOG4841, VOG4581, VOG4544, VOG5051, VOG4556, VOG4568, VOG0204, VOG4589	Caudoviricetes sp. isolate ctRgI1, partial genome	0.73	0.946	BK047375.1
L. huelsenbergensis DSM 115425	1	0	CP120687_1	1763292	1773851	False	Siphoviridae	VOG4799, VOG0189, VOG0982, VOG5280, VOG5317, VOG3307, VOG0198, VOG5088, VOG4570, VOG4549	Lactobacillus phage BH1, complete genome	0.31	0.9364	NC_048737.1
L. parahuelsenbergensis DSM 116105	1	0	NZ_CP132482_1	512043	552920	False	Siphoviridae	VOG0275, VOG6914, VOG9667, VOG6463, VOG4552, VOG4552, VOG0807, VOG0181, VOG10867, VOG4967, VOG3642, VOG0321, VOG0283, VOG0514, VOG0226, VOG4799, VOG0025, VOG7735, VOG4693, VOG0195, VOG0275, VOG4643, VOG0152, VOG5821, VOG3643, VOG0044, VOG3307, VOG0198, VOG4570, VOG4549, VOG9033, VOG4841, VOG4581, VOG4544, VOG3644, VOG4556, VOG4568, VOG4553, VOG10868, VOG0204, VOG4589, VOG0539, VOG0704, VOG4586, V…	Caudoviricetes sp. isolate ctSZ72, partial genome	0.59	0.9428	BK026384.1
L. styriensis DSM 116297	2	0	CP132483_1	806032	849447	False	Siphoviridae	VOG6422, VOG6914, VOG6495, VOG11003, VOG4552, VOG4891, VOG0181, VOG10867, VOG4967, VOG3642, VOG0321, VOG0322, VOG0226, VOG10904, VOG4566, VOG0189, VOG4584, VOG7018, VOG9860, VOG0536, VOG0822, VOG9741, VOG0152, VOG3643, VOG10904, VOG0102, VOG0102, VOG0044, VOG1563, VOG0198, VOG4570, VOG4549, VOG6794, VOG1345, VOG4841, VOG4581, VOG4544, VOG3644, VOG4556, VOG4568, VOG4553, VOG5601, VOG0204, VOG4589,…	Lactobacillus phage BH1, complete genome	23% 0.0 93.13 40721 NC_048737.1	0.9313	NC_048737.1
			CP132483_1	1139722	1169608	False	Siphoviridae	VOG1309, VOG0186, VOG4566, VOG0189, VOG9860, VOG6623, VOG4693, VOG0198, VOG4892, VOG4570, VOG0796, VOG4544, VOG0720, VOG4564, VOG4555, VOG1329, VOG4713, VOG0723, VOG5660, VOG0724, VOG0799, VOG0725, VOG0800, VOG4545, VOG4605, VOG4599, VOG7888, VOG0054, VOG4918, VOG0275	Caudoviricetes sp. isolate ctRgI1, partial genome	0.73	0.946	BK047375.1
PRA205	3	1	KEYWORDS-3	33153	55471	False	Siphoviridae	VOG0221, VOG4581, VOG1886, VOG4556, VOG4568, VOG0205, VOG0207, VOG4586, VOG0209, VOG6163, VOG4605, VOG4599, VOG7896, VOG0753, VOG0703, VOG8294	Caudoviricetes sp. isolate ctFbL5	0.64	0.9192	BK058499.1
			KEYWORDS-4	140639	151525	False	Siphoviridae	VOG0204, VOG4568, VOG4556, VOG5051, VOG4544, VOG4581, VOG4841, VOG0205, VOG4606, VOG4606, VOG4632, VOG1581	Caudoviricetes sp. isolate ctG1U4	0.87	0.9731	BK021574.1
			KEYWORDS-16	3083	14431	True	Siphoviridae	VOG4799, VOG0189, VOG0982, VOG5280, VOG5317, VOG3307, VOG0198, VOG5088, VOG4570, VOG4570, VOG4549, VOG5532, VOG8387	Lactobacillus phage BH1, complete genome	0.28	0.9331	NC_048737.1

[truncated: 6 more sheets: TableS10cas, Table S11_CRISPR, TableS12_antiSMASH, TableS13_GT8, Table_S14_locustag, Table_S15]
